# Supplementary material for: Lithium and magnesium complexes by using pyridyl-pendanted unsymmetrical β-diketiminates: syntheses and application as catalysts for the hydroboration of carbonyl compounds
Source: Royal Society of Chemistry journal article supplement (doi:10.1039/d1dt03235f), 2022-01-01
Supplement: d1dt03235f1.pdf [file d1dt03235f1.pdf]

*Supporting Information for*

**Lithium and magnesium complexes from the employment of  
pyridyl-pendant unsymmetrical  $\beta$ -diketiminates: syntheses  
and utilization as catalysts for the hydroboration of carbonyl  
compounds**

Yafei Li,<sup>†a</sup> Huifen Pan,<sup>†a</sup> **Yanhua Lu,<sup>a</sup>** Yanshu Luo,<sup>b</sup> Yan Dang,<sup>a</sup> Yalan Wang,<sup>a</sup>  
Shengwang Xia<sup>a</sup> and Yahong Li<sup>\*a</sup> and Yuanzhi Xia<sup>\*b</sup>

*<sup>a</sup> College of Chemistry, Chemical Engineering and Materials Science, Soochow  
University, Suzhou 215123, People's Republic of China.*

*<sup>b</sup> College of Chemistry and Materials Engineering, Wenzhou University, Wenzhou  
325035, People's Republic of China.*

*E-mail: [liyahong@suda.edu.cn](mailto:liyahong@suda.edu.cn); [xyz@wzu.edu.cn](mailto:xyz@wzu.edu.cn)*

*<sup>†</sup>These two authors contribute equally to this paper.*

|                                                                                   |    |
|-----------------------------------------------------------------------------------|----|
| 1. Synthesis of complexes <b>1-3</b> .....                                        | 2  |
| 2. NMR spectra of complexes <b>1-3</b> .....                                      | 3  |
| 3. NMR spectra of the products of the hydroboration of aldehydes with HBpin ..... | 6  |
| 4. NMR spectra of the products of the hydroboration of ketones with HBpin .....   | 13 |
| 5. Chemoselective hydroboration of aldehydes catalyzed by <b>1</b> .....          | 19 |
| 6. <b>Stoichiometric reactions of complex 1 with benzaldehyde and HBpin</b> ..... | 23 |
| 7. Gram-scale synthesis of <b>8f</b> catalyzed by complex <b>2</b> .....          | 26 |
| 8. Crystallographic data and structure refinements for complexes <b>1-3</b> ..... | 28 |
| 9. Selected bond lengths [Å] and angles [°] for complexes <b>1-3</b> .....        | 29 |
| 10. Molecular structure of complex <b>2</b> .....                                 | 30 |
| 11. Computational details and results .....                                       | 31 |

## 1. Synthesis of complexes 1-3

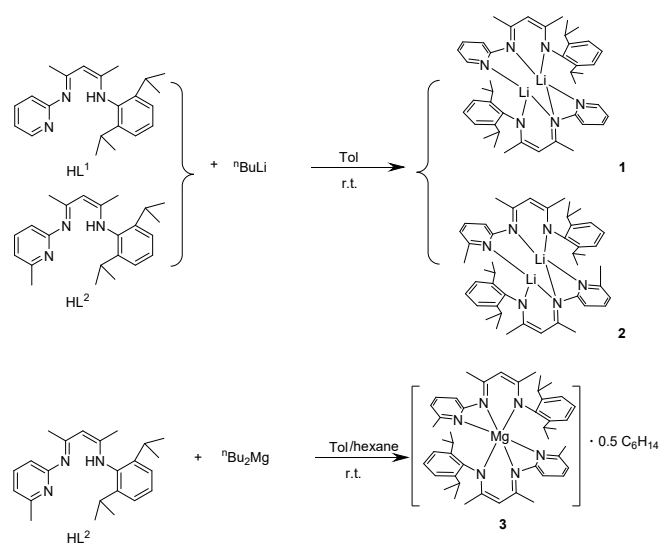

**Scheme S1.** Synthesis of complexes 1-3

## 2. NMR spectra of complexes 1-3

**Complex 1:**  $^1\text{H}$  NMR (600 MHz, Chloroform- $d$ )  $\delta$  7.23 – 7.20 (m, 2H), 7.06 (d, 2H), 7.00 (dd, 1H), 6.50 (d, 1H), 6.26 (m, 1H), 4.83 (s, 1H), 2.99 (m, 2H), 1.80 (s, 3H), 1.68 (s, 3H), 1.15 (d, 6H), 1.03 (d, 6H).  $^{13}\text{C}$  NMR (151 MHz, Chloroform- $d$ )  $\delta$  166.75, 166.59, 161.01, 147.62, 146.30, 145.64, 139.75, 136.68, 123.00, 122.89, 122.72, 117.66, 113.73, 100.46, 28.26, 27.90, 23.83, 23.58, 23.41, 23.31, 22.57, 22.54.

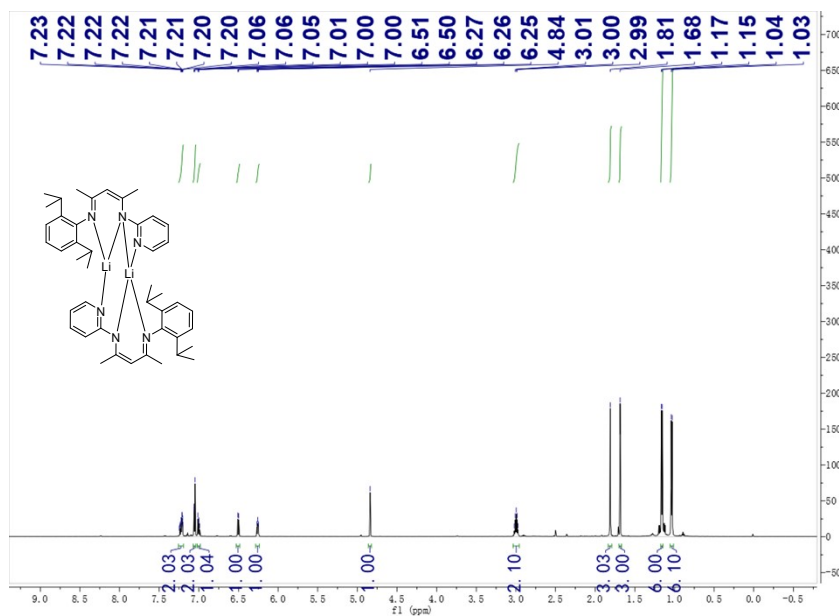

Fig. S1  $^1\text{H}$  NMR spectrum of complex 1.

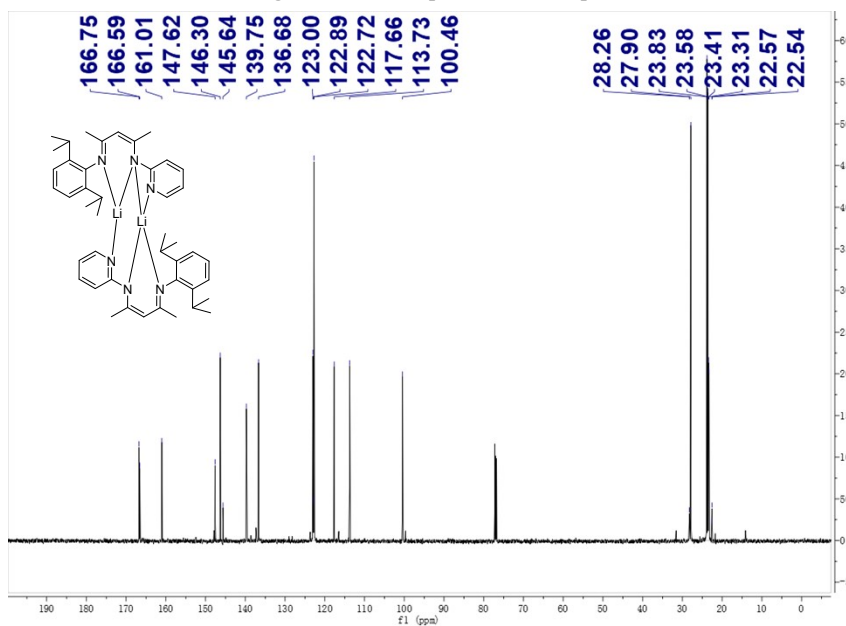

Fig. S2  $^{13}\text{C}$  NMR spectrum of complex 1.

**Complex 2:**  $^1\text{H}$  NMR (600 MHz, Chloroform- $d$ )  $\delta$  7.16 (t, 1H), 7.09 – 6.96 (m, 3H), 6.36 (d, 1H), 6.17 (d, 1H), 4.78 (s, 1H), 3.02 (m, 2H), 1.77 (s, 6H), 1.68 (s, 3H), 1.20 – 1.12 (m, 6H), 1.10 (s, 3H), 0.92 (s, 3H).  $^{13}\text{C}$  NMR (151 MHz, Chloroform- $d$ )  $\delta$  167.25, 165.79, 160.91, 155.10, 147.81, 140.33, 139.51, 136.84, 123.00, 122.84, 114.14, 112.83, 100.74, 27.96, 27.58, 24.52, 24.06, 23.90, 23.75, 23.49, 23.16, 23.07, 22.57.

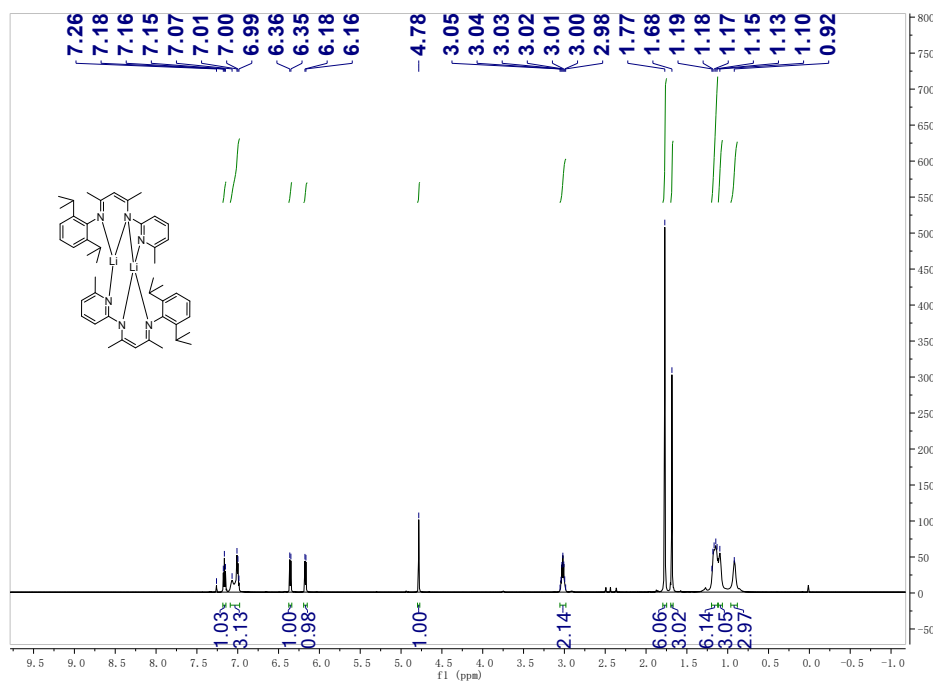

**Fig. S3**  $^1\text{H}$  NMR spectrum of complex 2.

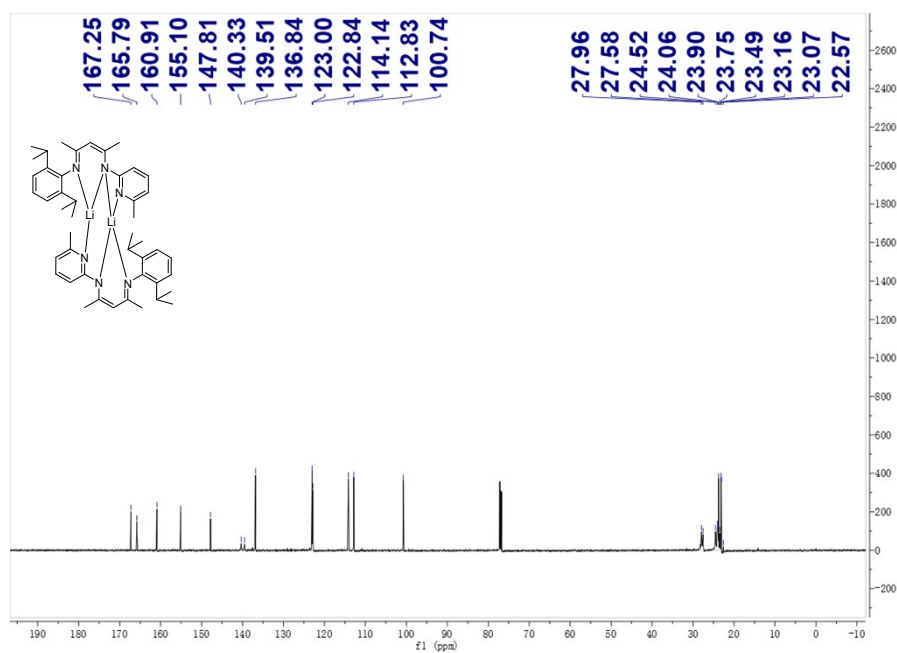

**Fig. S4**  $^{13}\text{C}$  NMR spectrum of complex 2.

**Complex 3:**  $^1\text{H}$  NMR: (400 MHz,  $\text{Benze-d}_6$ )  $\delta$  7.22 (d, 1H), 7.06 (t, 1H), 6.95 (d, 1H), 6.88 (t, 1H), 6.27 (d, 1H), 6.06 (d, 1H), 4.76 (s, 1H), 3.52 (m, 1H), 3.11 (m, 1H), 1.80 (s, 3H), 1.76 (s, 3H), 1.64 (s, 3H), 1.56 (d, 3H), 1.30 (d, 3H), 1.04 (d, 3H), 0.61 (d, 3H).  $^{13}\text{C}$  NMR (151MHz,  $\text{Benze-d}_6$ )  $\delta$  170.55, 161.76, 158.07, 156.42, 148.51, 142.20, 141.61, 137.77, 124.55, 123.77, 123.20, 28.97, 27.94, 27.26, 26.54, 25.53, 25.49, 24.28, 23.61, 22.10.

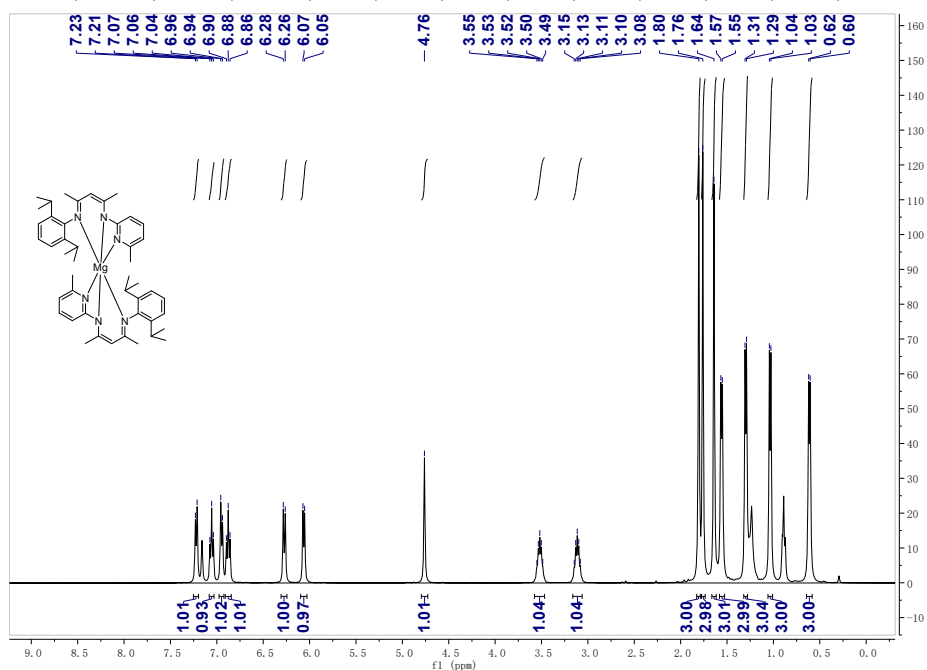

**Fig. S5**  $^1\text{H}$  NMR spectrum of complex 3.

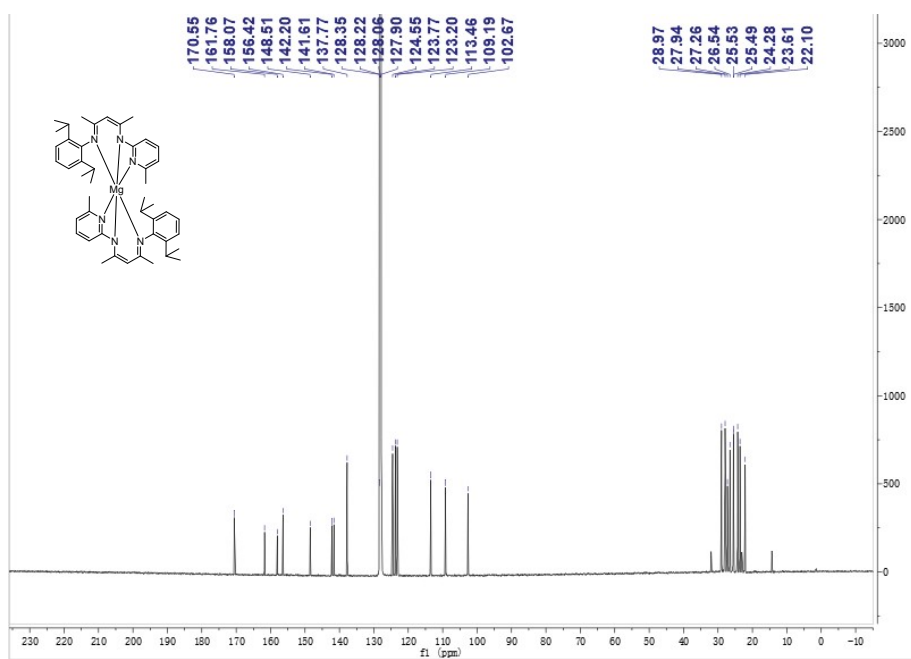

**Fig. S6**  $^{13}\text{C}$  NMR spectrum of complex 3.

### 3. NMR spectra of the products of the hydroboration of aldehydes with HBPin

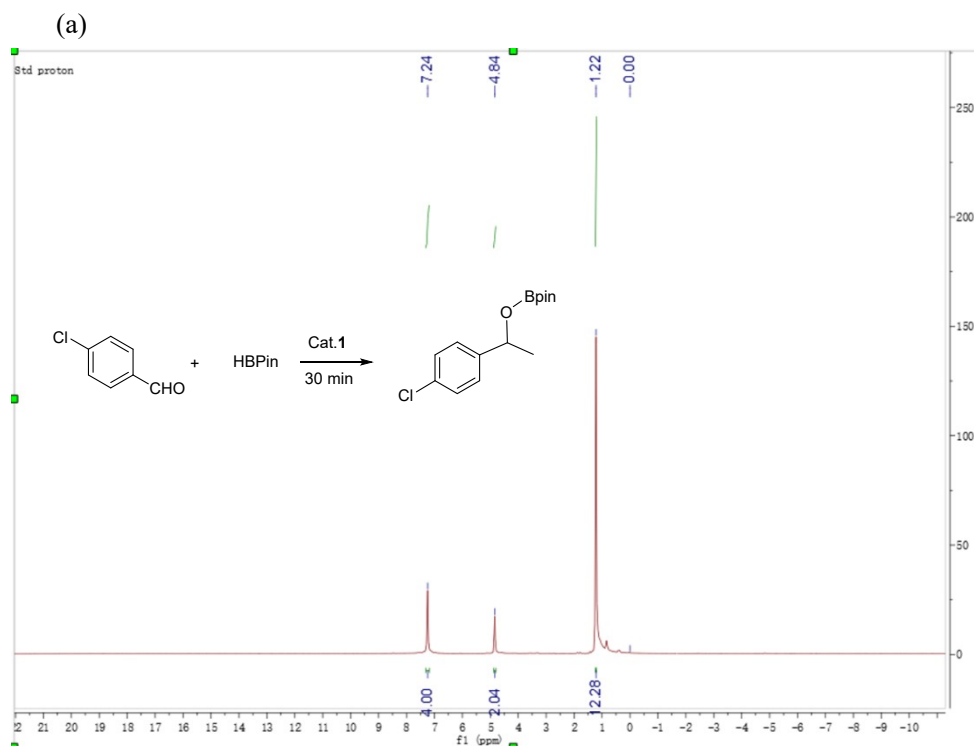

(b)

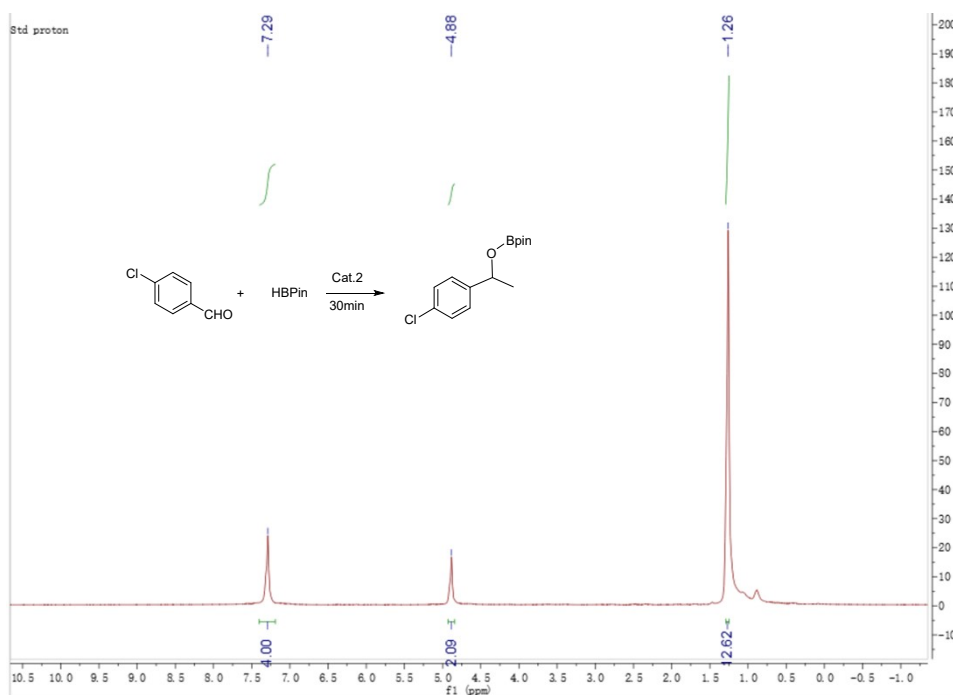

**Fig. S7**  $^1\text{H}$  NMR spectra of **5a** catalyzed by compounds **1** (a) and **2** (b).

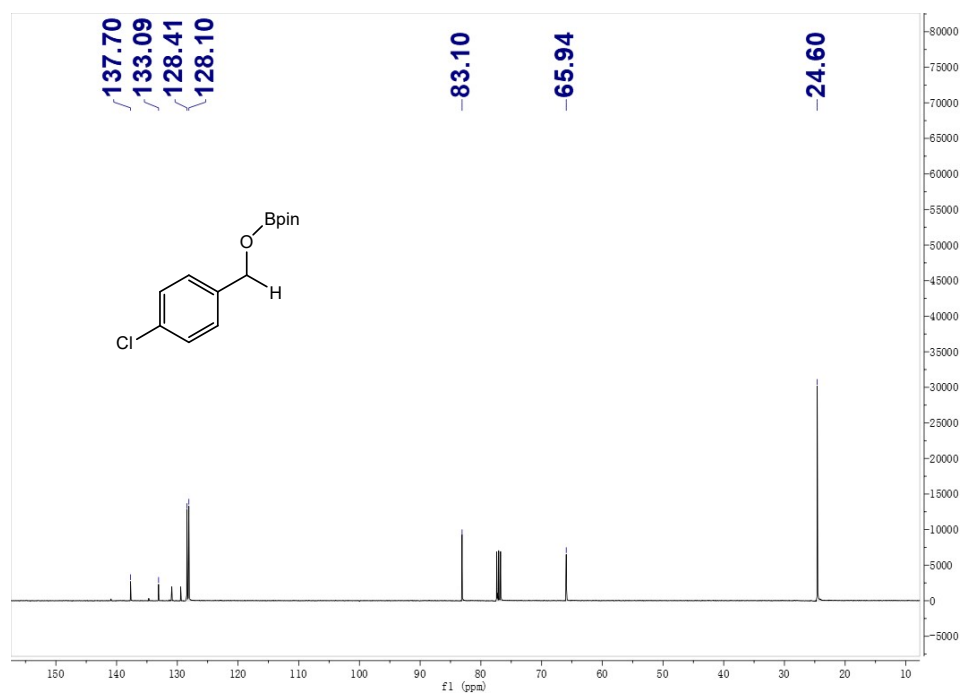

**Fig. S8**  $^{13}\text{C}$  NMR spectrum of **5a**.

**5a:**  $^1\text{H}$  NMR (300 MHz, Chloroform-*d*)  $\delta$  7.29 (d, 4H), 4.88 (s, 2H), 1.26 (s, 12H).  $^{13}\text{C}$  NMR (151 MHz, Chloroform-*d*)  $\delta$  137.70, 133.09, 128.41, 128.10, 83.10, 65.94, 24.60.

(a)

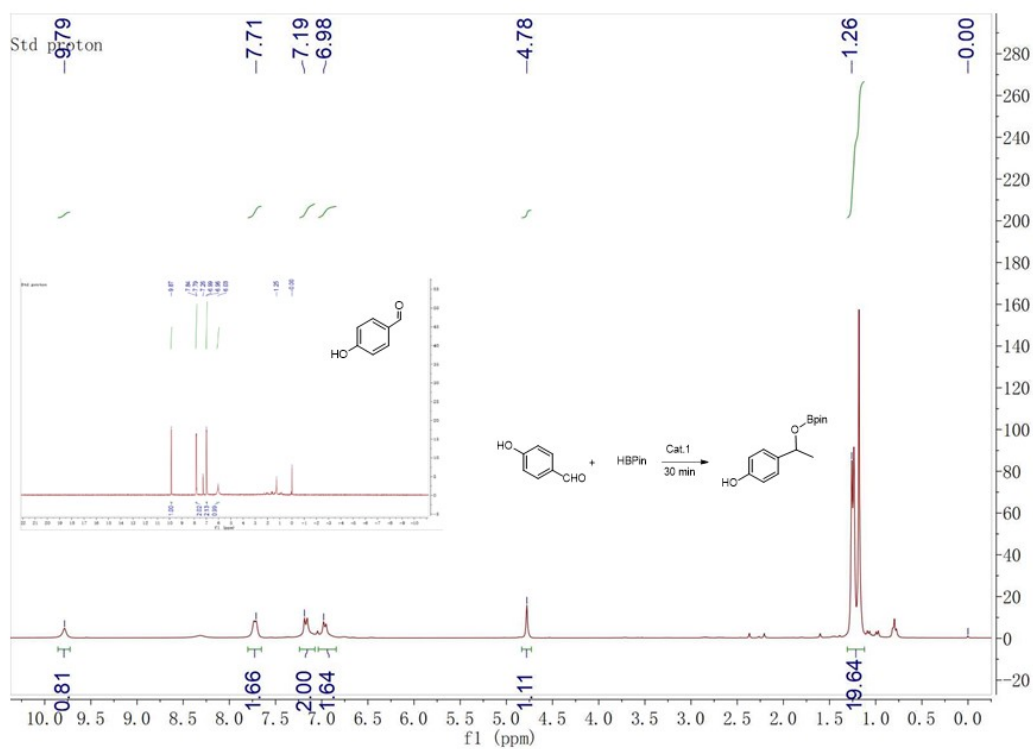

(b)

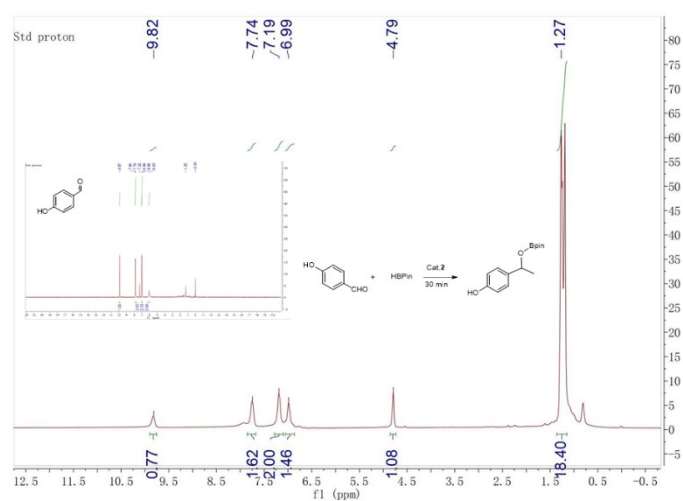

(c)

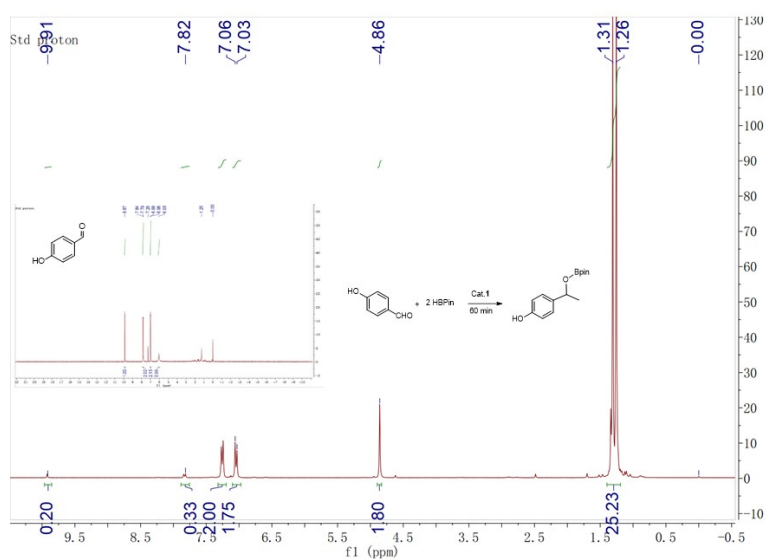

(d)

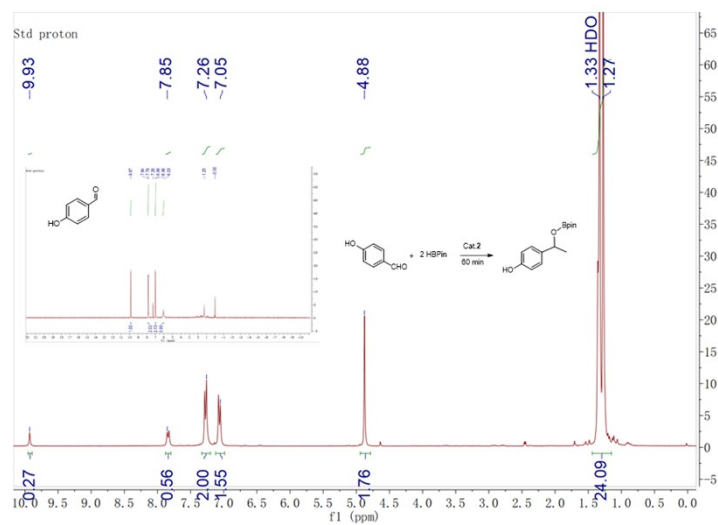

**Fig. S9** <sup>1</sup>H NMR spectra of 5b catalyzed by compound 1 after 30 min (a) and 60 min with 2 equiv of HBpin (c), and catalyzed by 2 after 30 min (b) and 60 min with 2 equiv of HBpin (d).



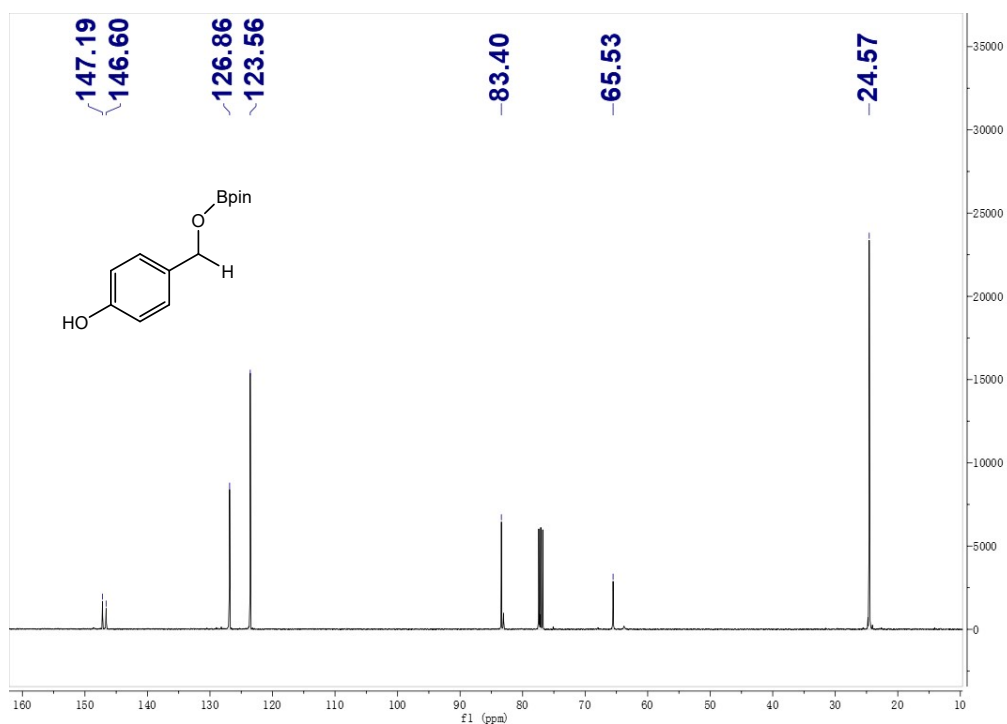

Fig. S10  $^{13}\text{C}$  NMR spectrum of 5b.

5b:  $^1\text{H}$  NMR (300 MHz, Chloroform-*d*)  $\delta$  7.24 (d, 2H), 7.05(d, 2H), 4.88 (s, 2H), 1.26 (s, 12H).  $^{13}\text{C}$  NMR (151 MHz, Chloroform-*d*)  $\delta$  147.19, 146.60, 126.86, 123.56, 83.40, 65.53, 24.57.

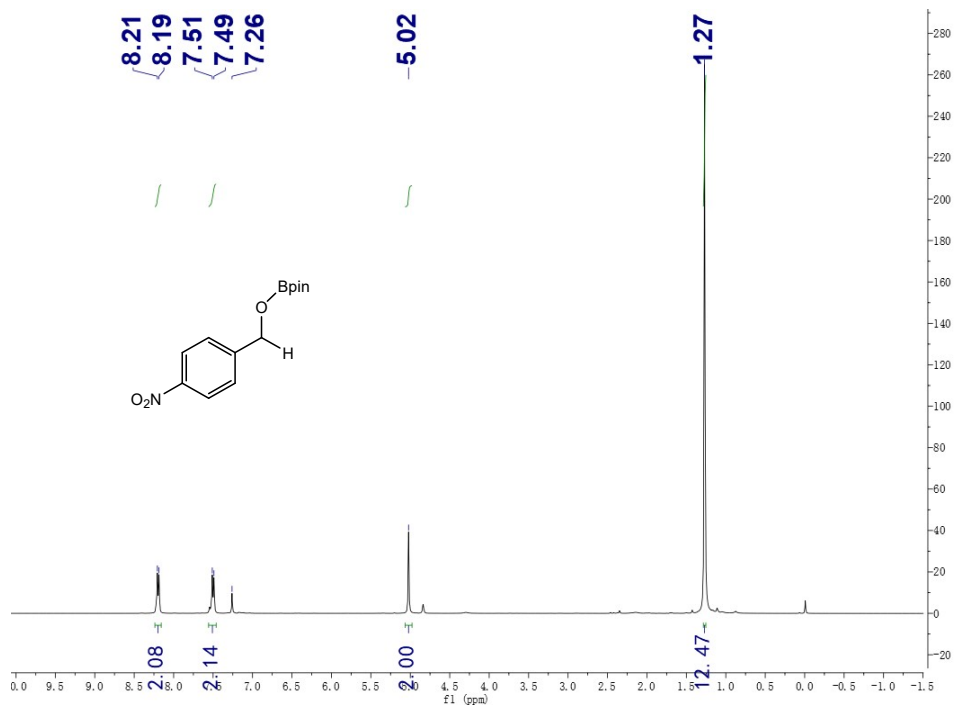

Fig. S11  $^1\text{H}$  NMR spectrum of 5c.

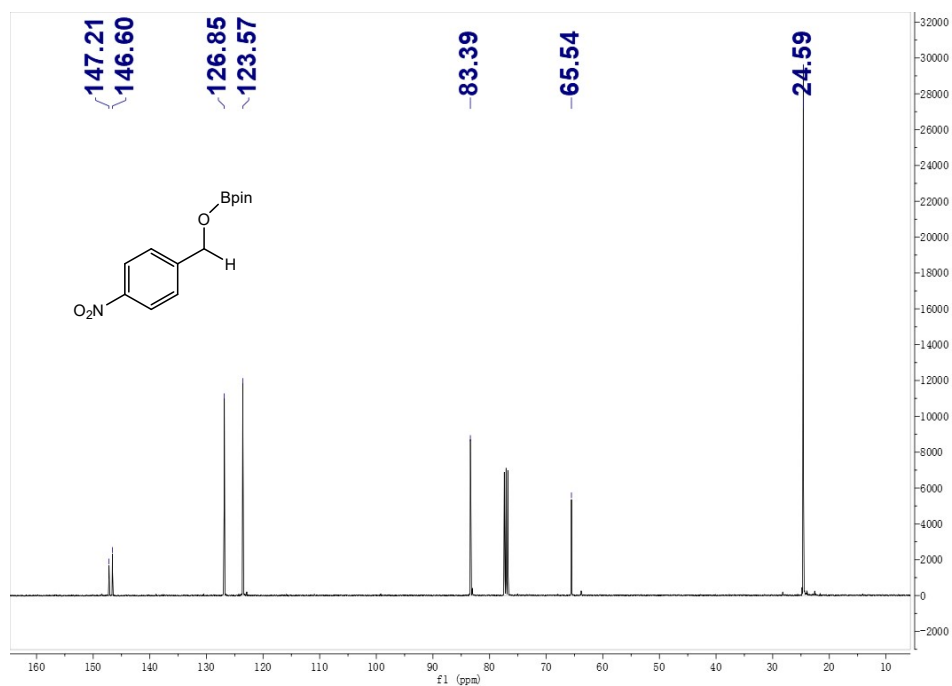

Fig. S12  $^{13}\text{C}$  NMR spectrum of product 5c.

5c:  $^1\text{H}$  NMR (400 MHz, Chloroform-*d*)  $\delta$  8.20 (d, 2H), 7.50 (d, 2H), 5.02 (s, 2H), 1.27 (s, 12H).  $^{13}\text{C}$  NMR (151 MHz, Chloroform-*d*)  $\delta$  147.21, 146.60, 126.85, 123.57, 83.39, 65.54, 24.59.

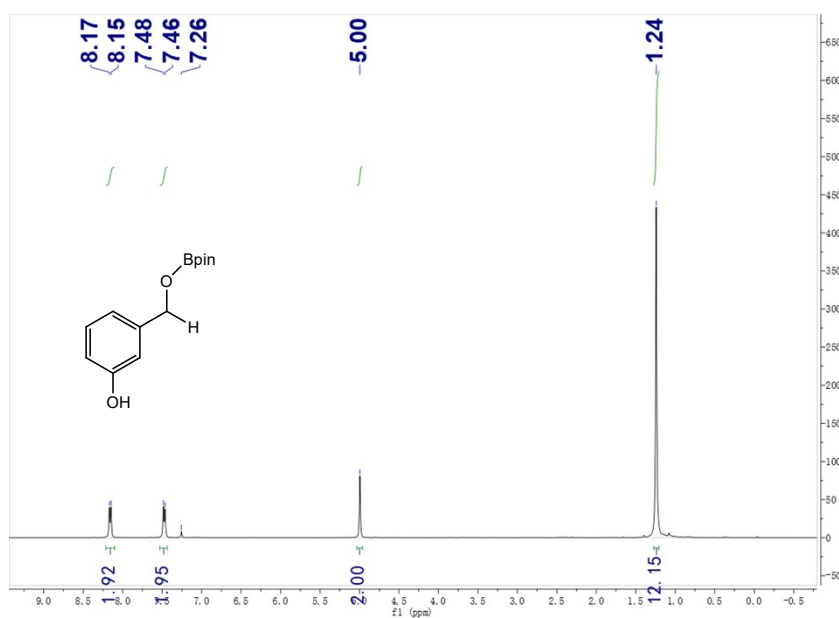

Fig. S13  $^1\text{H}$  NMR spectrum of 5d.

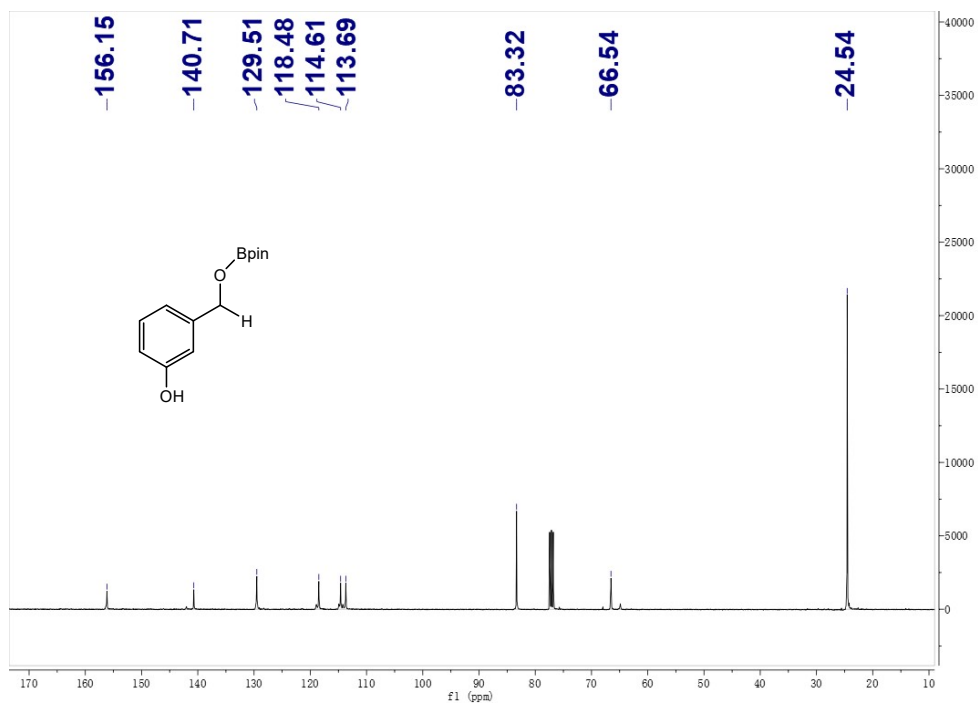

Fig. S14  $^{13}\text{C}$  NMR spectrum of **5d**.

**5d**:  $^1\text{H}$  NMR (400 MHz, Chloroform-*d*)  $\delta$  8.16 (d, 2H), 7.47 (d, 2H), 5.00 (s, 2H), 1.24 (s, 12H).  $^{13}\text{C}$  NMR (151 MHz, Chloroform-*d*)  $\delta$  156.15, 140.71, 129.51, 118.48, 114.61, 113.69, 83.32, 66.54, 24.54.

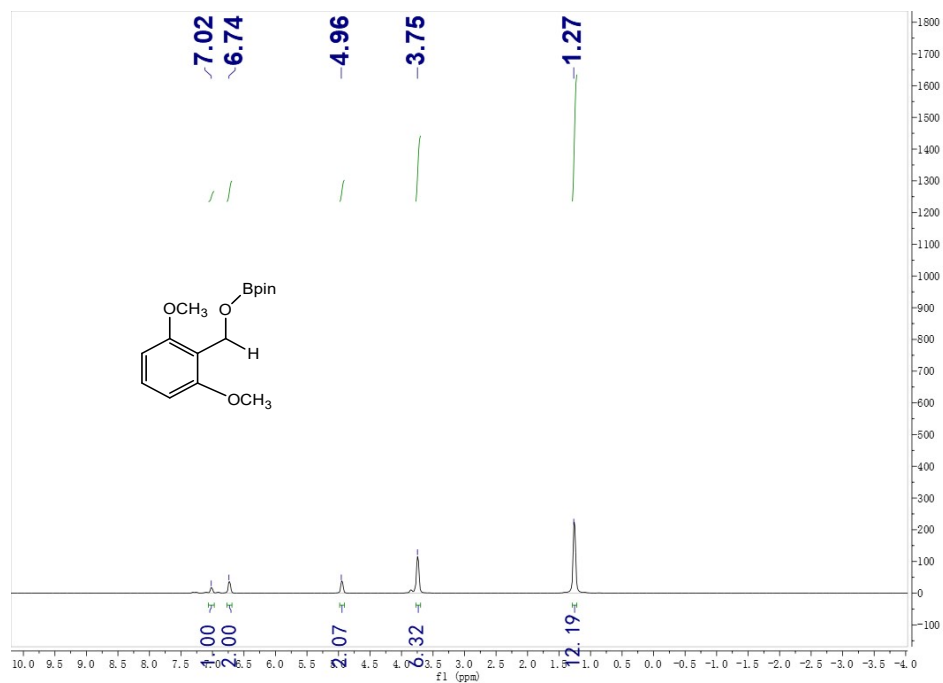

Fig. S15  $^1\text{H}$  NMR spectrum of **5e**.

**5e**:  $^1\text{H}$  NMR (400 MHz, Chloroform-*d*)  $\delta$  7.02 (s, 1H), 6.74 (s, 2H), 4.96 (s, 2H), 3.75 (s, 6H), 1.27 (s, 12H).

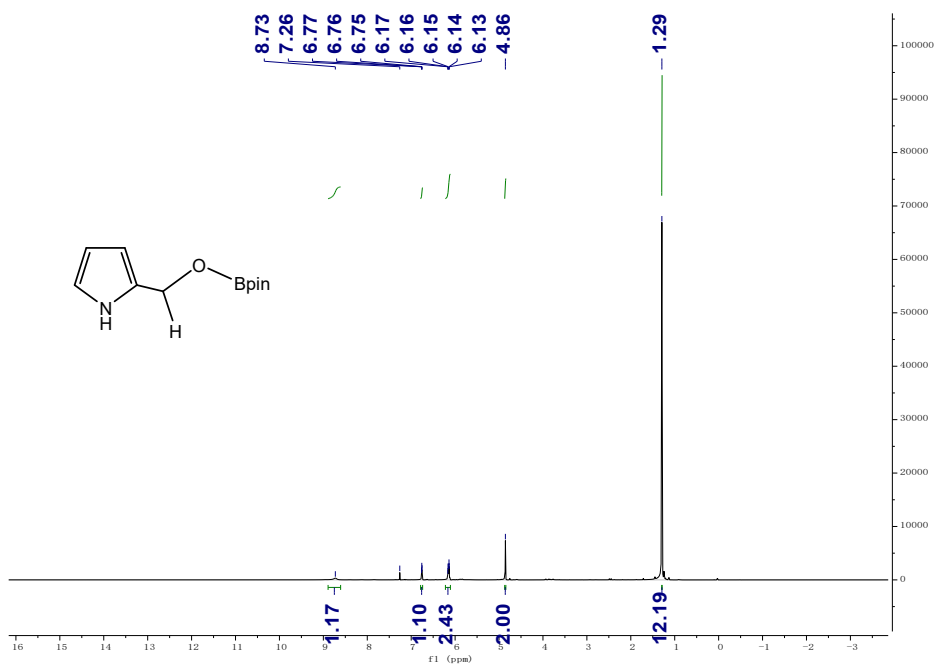

Fig. S16  $^1\text{H}$  NMR spectrum of **5f**

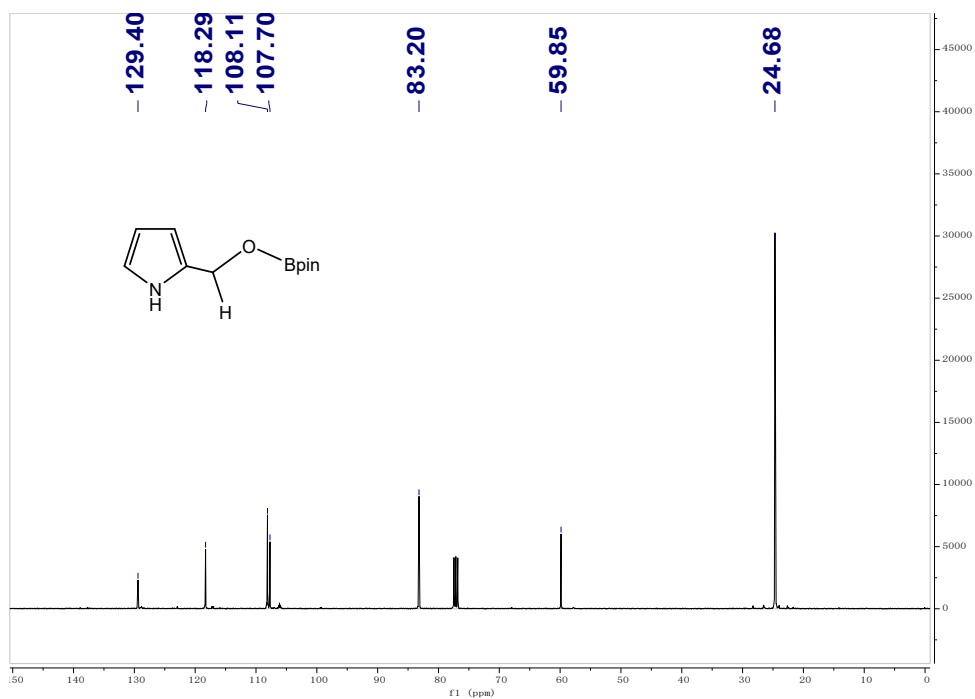

Fig. S17  $^{13}\text{C}$  NMR spectrum of **5f**.

**5f**:  $^1\text{H}$  NMR (400 MHz, Chloroform-*d*)  $\delta$  8.73 (s, 1H), 6.76 (t, 1H), 6.17 – 6.13 (m, 2H), 4.86 (s, 2H), 1.29 (s, 12H).  
 $^{13}\text{C}$  NMR (151 MHz, Chloroform-*d*)  $\delta$  129.40, 118.29, 108.11, 107.70, 83.20, 59.85, 24.68.

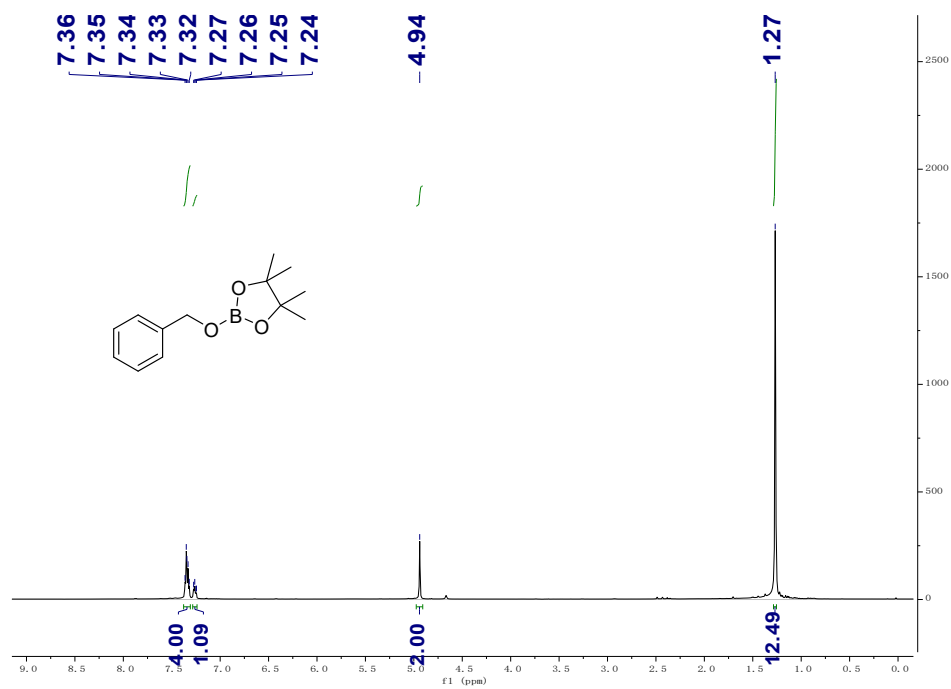

Fig. S18  $^1\text{H}$  NMR spectrum of **5g**.

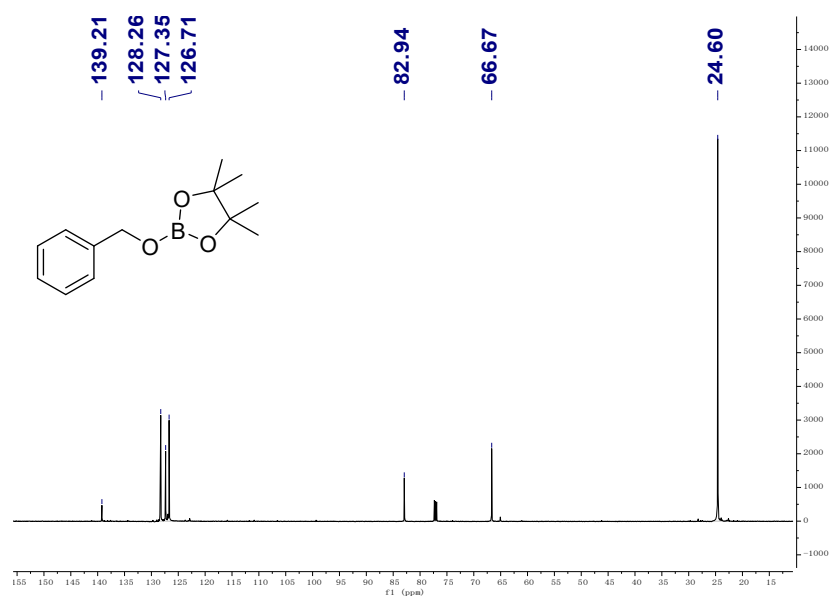

Fig. S19  $^{13}\text{C}$  NMR spectrum of **5g**.

**5g**:  $^1\text{H}$  NMR (600 MHz, Chloroform-*d*)  $\delta$  7.37 – 7.31 (m, 4H), 7.27 – 7.24 (m, 1H), 4.94 (s, 2H), 1.27 (s, 12H).  $^{13}\text{C}$  NMR (151 MHz, Chloroform-*d*)  $\delta$  139.21, 128.26, 127.35, 126.71, 82.94, 66.67, 24.60.

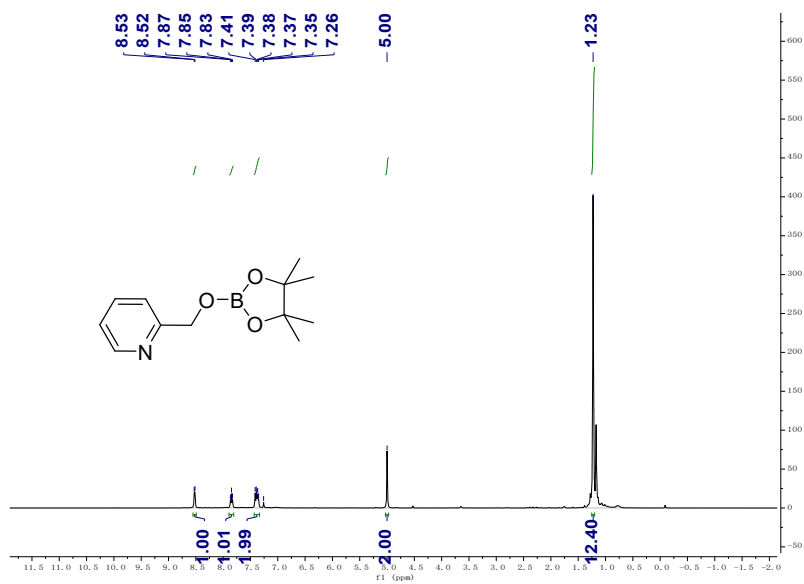

**Fig. S20**  $^1\text{H}$  NMR spectrum of **5h**

**5h**:  $^1\text{H}$  NMR (400 MHz, Chloroform-*d*)  $\delta$  8.52 (d, 1H), 7.85 (t, 1H), 7.43 – 7.33 (m, 2H), 5.00 (s, 2H), 1.23 (s, 12H).

#### 4. NMR Spectra of the products of the hydroboration of ketones with HBpin

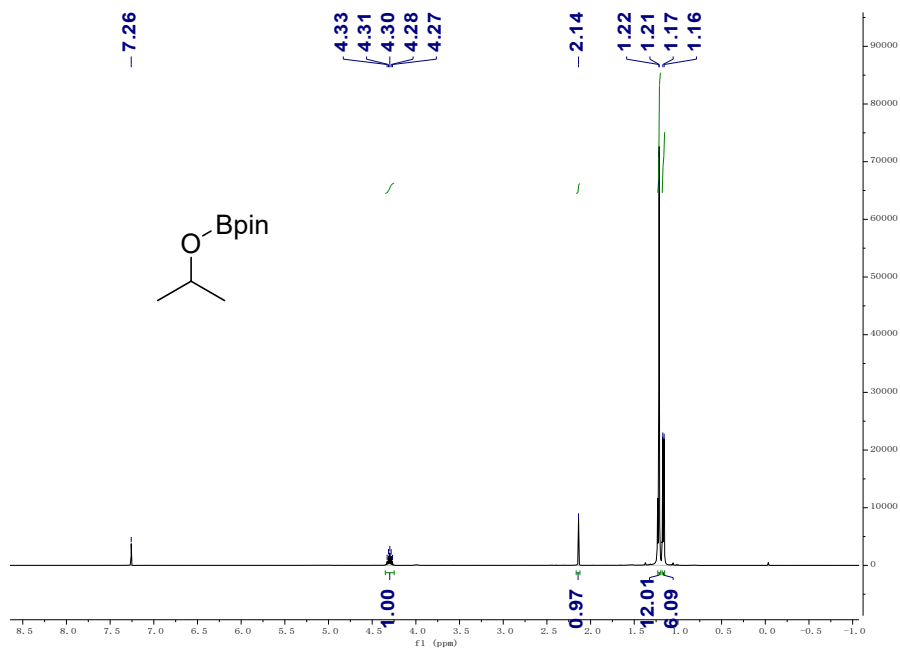

Fig. S21 <sup>1</sup>H NMR spectrum of 7a.

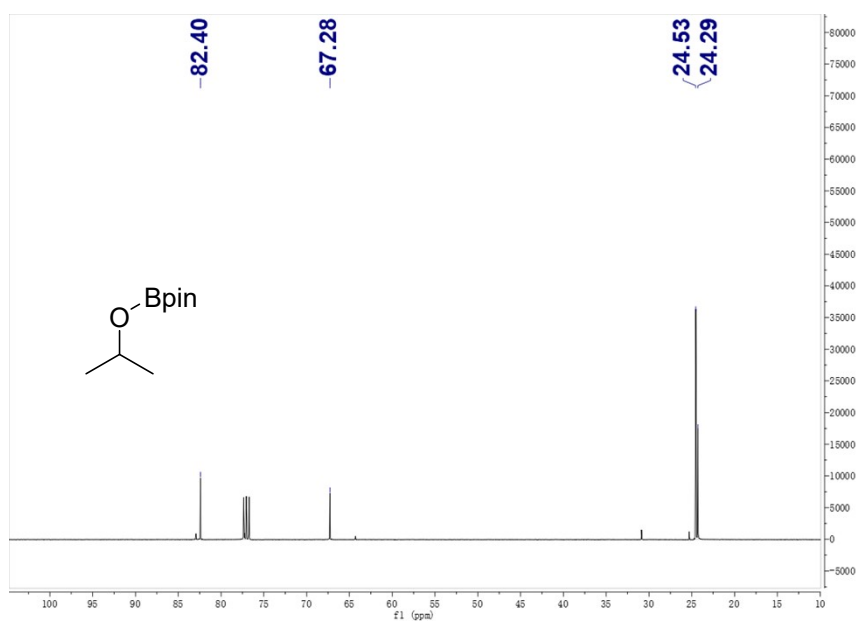

Fig. S22 <sup>13</sup>C NMR spectrum of 7a.

7a: <sup>1</sup>H NMR (400 MHz, Chloroform-*d*) δ 4.33 – 4.27 (m, 1H), 1.22 (d, 12H), 1.17 (d, 6H). <sup>13</sup>C NMR (151 MHz, Chloroform-*d*) δ 82.40, 67.28, 24.53, 24.29.

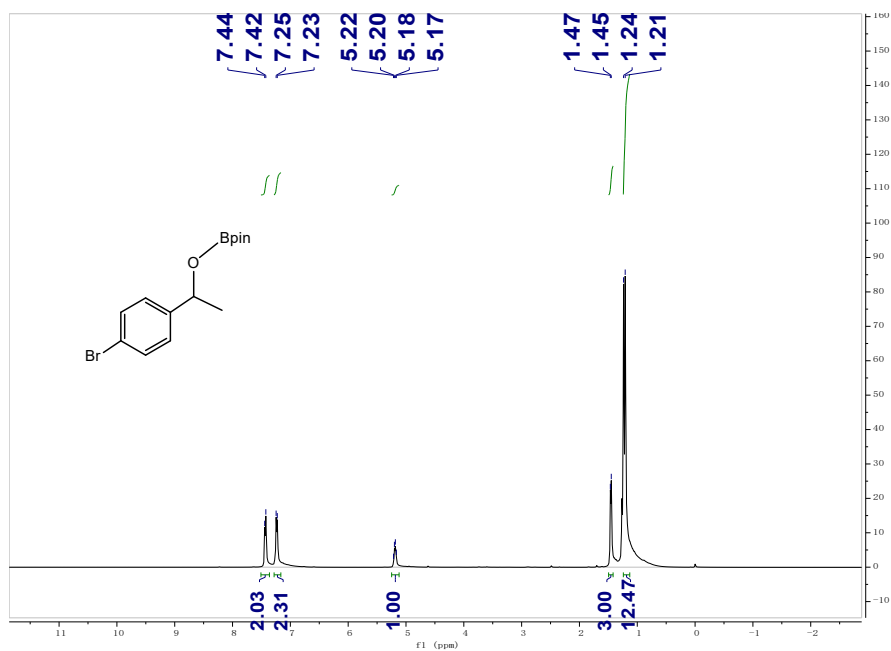

Fig. S23  $^1\text{H}$  NMR spectrum of 7b.

7b:  $^1\text{H}$  NMR (400 MHz, Chloroform-*d*)  $\delta$  7.43 (d, 2H), 7.24 (d, 2H), 5.19 (q, 1H), 1.46 (d, 3H), 1.22 (d, 12H).

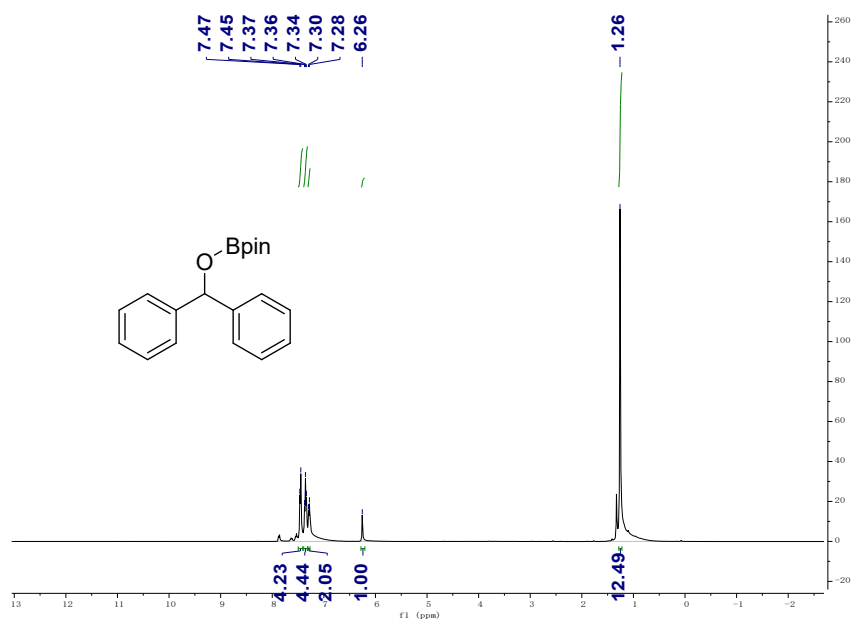

Fig. S24  $^1\text{H}$  NMR spectrum of 7c.

7c:  $^1\text{H}$  NMR (400 MHz, Chloroform-*d*)  $\delta$  7.46 (d, 4H), 7.36 (t, 4H), 7.29 (d, 2H), 6.26 (s, 1H), 1.26 (s, 12H).



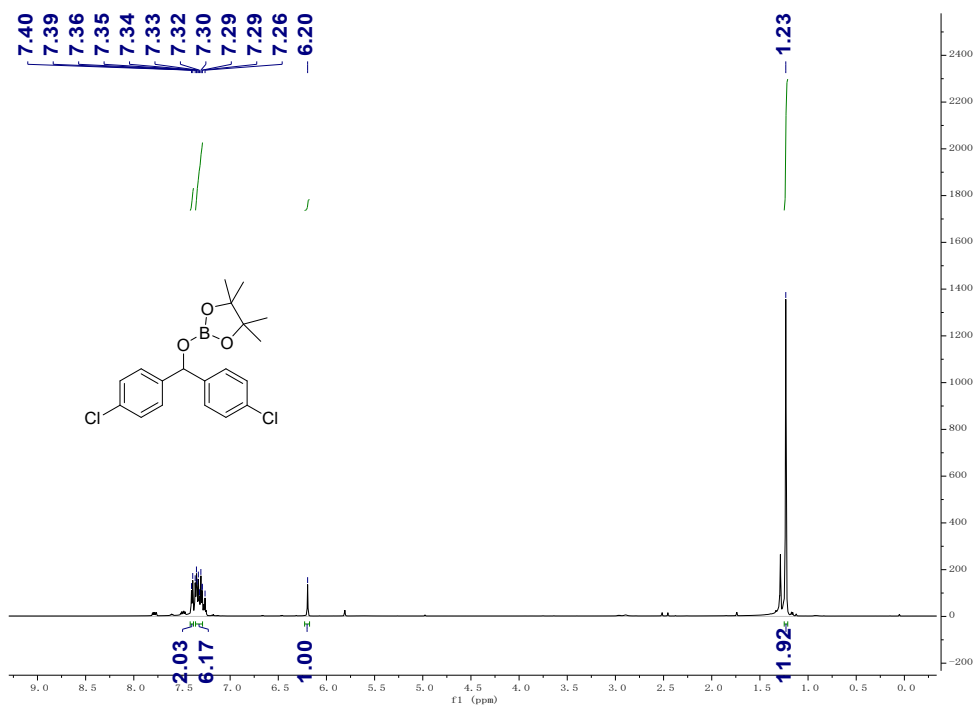

Fig. S25  $^1\text{H}$  NMR spectrum of 7d.

7d:  $^1\text{H}$  NMR (600 MHz, Chloroform-*d*)  $\delta$  7.39 (d, 2H), 7.32 (m, 6H), 6.20 (s, 1H), 1.23 (s, 12H).

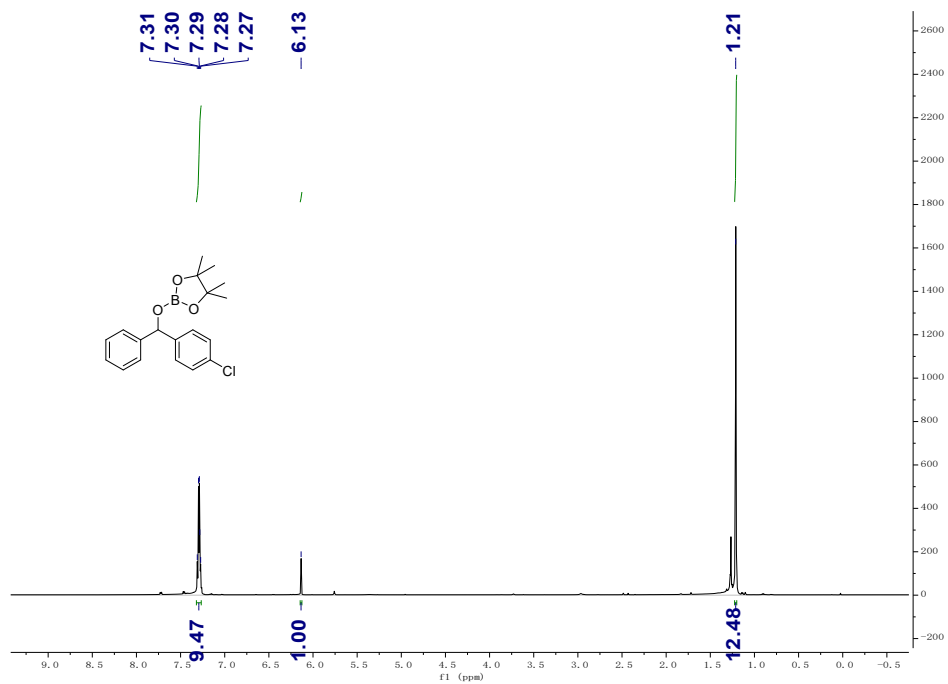

Fig. S26  $^1\text{H}$  NMR spectrum of 7e.

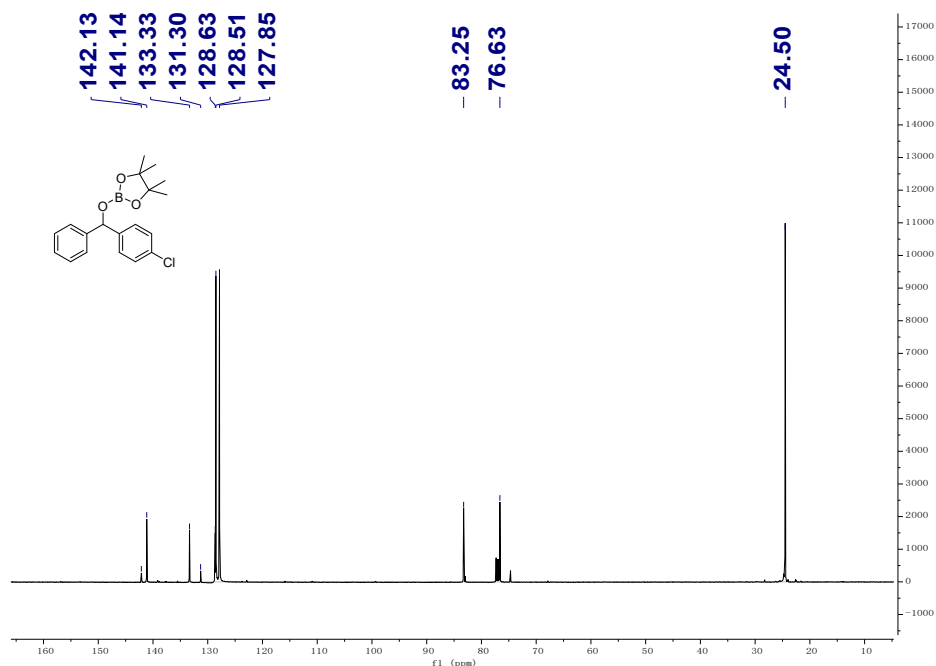

**Fig. S27**  $^{13}\text{C}$  NMR spectrum of **7e**.

**7e**:  $^1\text{H}$  NMR (600 MHz, Chloroform-*d*)  $\delta$  7.32 – 7.27 (m, 9H), 6.13 (s, 1H), 1.21 (s, 12H).  $^{13}\text{C}$  NMR (151 MHz, Chloroform-*d*)  $\delta$  142.13, 141.14, 133.33, 131.30, 128.63, 128.51, 127.85, 83.25, 76.63, 24.50.

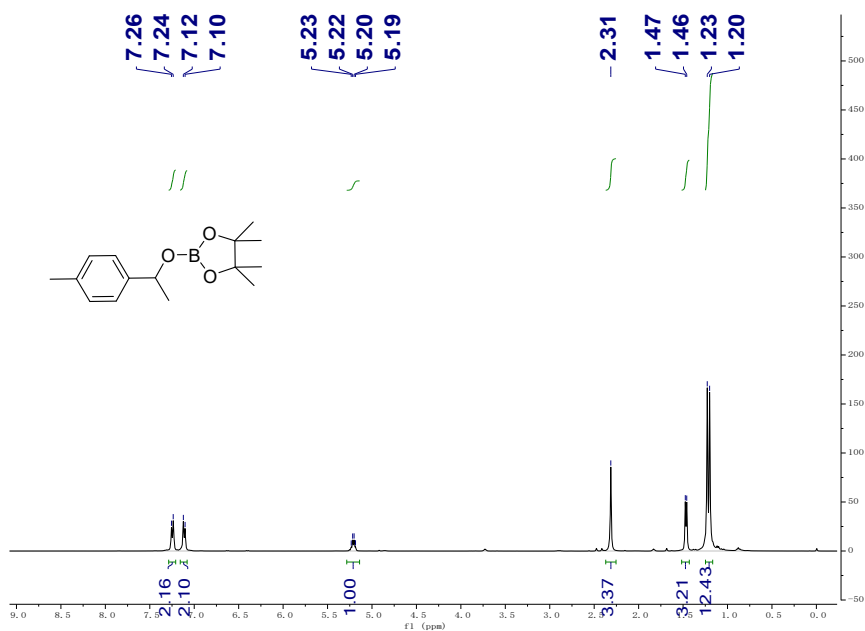

**Fig. S28.**  $^1\text{H}$  NMR spectrum of **7f**.

**7f**:  $^1\text{H}$  NMR (400 MHz, Chloroform-*d*)  $\delta$  7.25 (d, 2H), 7.11 (d, 2H), 5.21 (q, 1H), 2.31 (s, 3H), 1.47 (d, 3H), 1.21 (d, 12H).

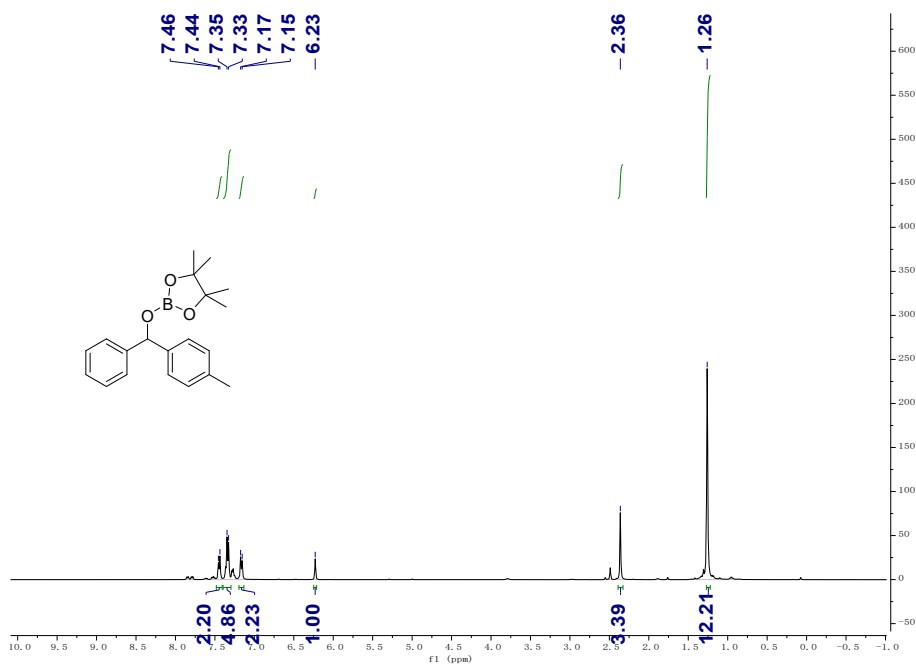

**Fig. S29**  $^1\text{H}$  NMR spectrum of **7g**.

**7g**:  $^1\text{H}$  NMR (400 MHz, Chloroform-*d*)  $\delta$  7.45 (d, 2H), 7.34 (d, 5H), 7.16 (d,  $J = 7.8$  Hz, 2H), 6.23 (s, 1H), 2.36 (s, 3H), 1.26 (s, 12H).

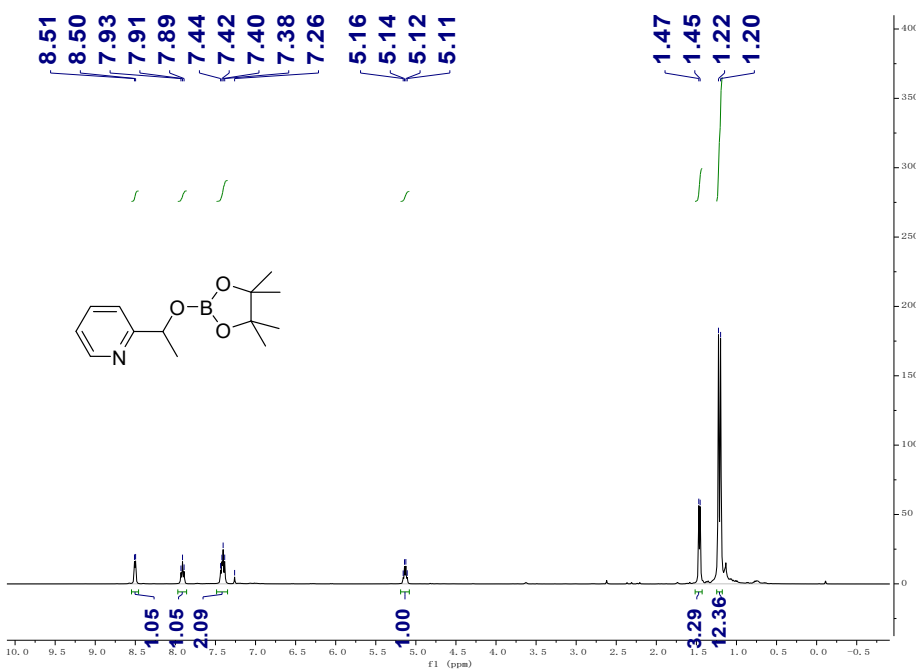

**Fig. S30**  $^1\text{H}$  NMR spectrum of **7h**.

**7h**:  $^1\text{H}$  NMR (400 MHz, Chloroform-*d*)  $\delta$  8.50 (d, 1H), 7.91 (t, 1H), 7.47 – 7.36 (m, 2H), 5.13 (m, 1H), 1.46 (d, 3H), 1.21 (d, 12H).

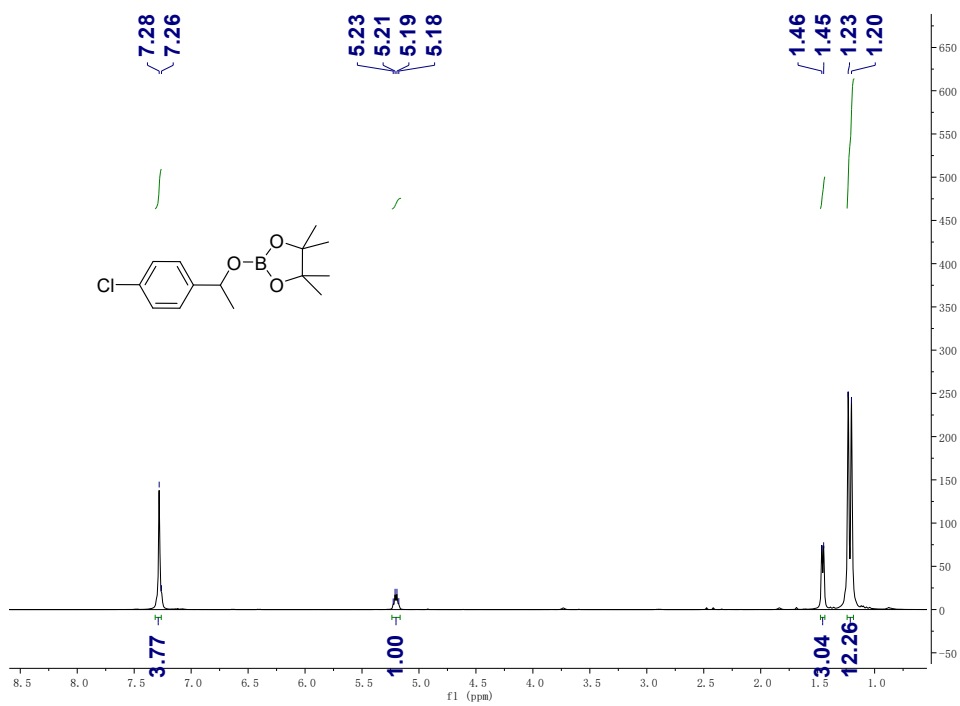

**Fig. S31**  $^1\text{H}$  NMR spectrum of **7i**.

**7i:**  $^1\text{H}$  NMR (400 MHz, Chloroform-*d*)  $\delta$  7.28 (s, 4H), 5.20 (q, 1H), 1.46 (d, 3H), 1.22 (d, 12H).

## 5. Chemoselective hydroboration of aldehydes catalyzed by **1**

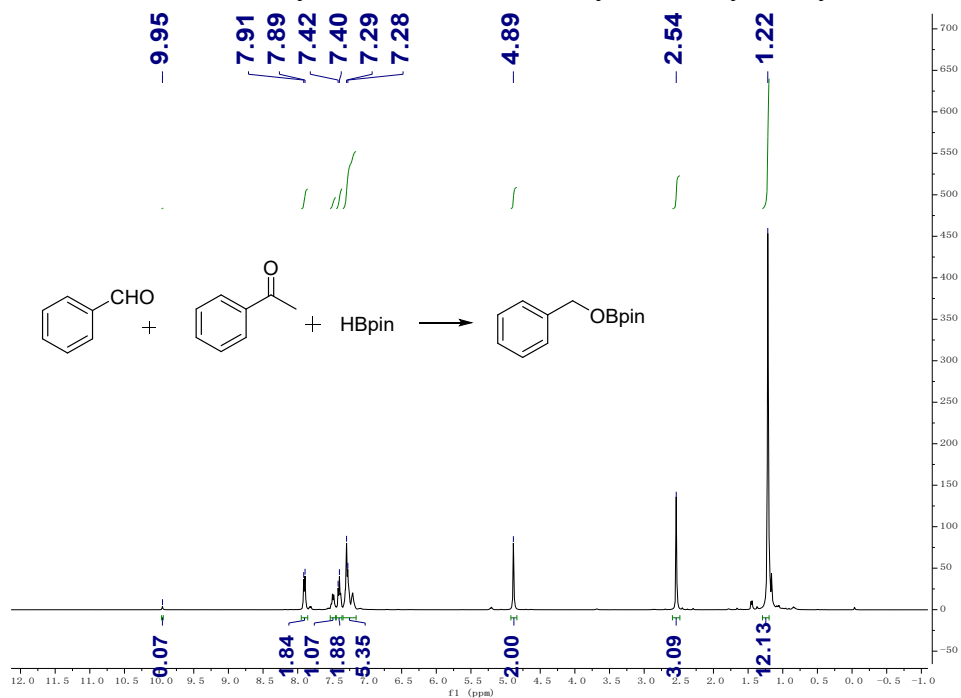

**Fig. S32** <sup>1</sup>H NMR spectrum of the product of the reaction of benzaldehyde and acetophenone with HBpin in a 1:1:1 molar ratio.

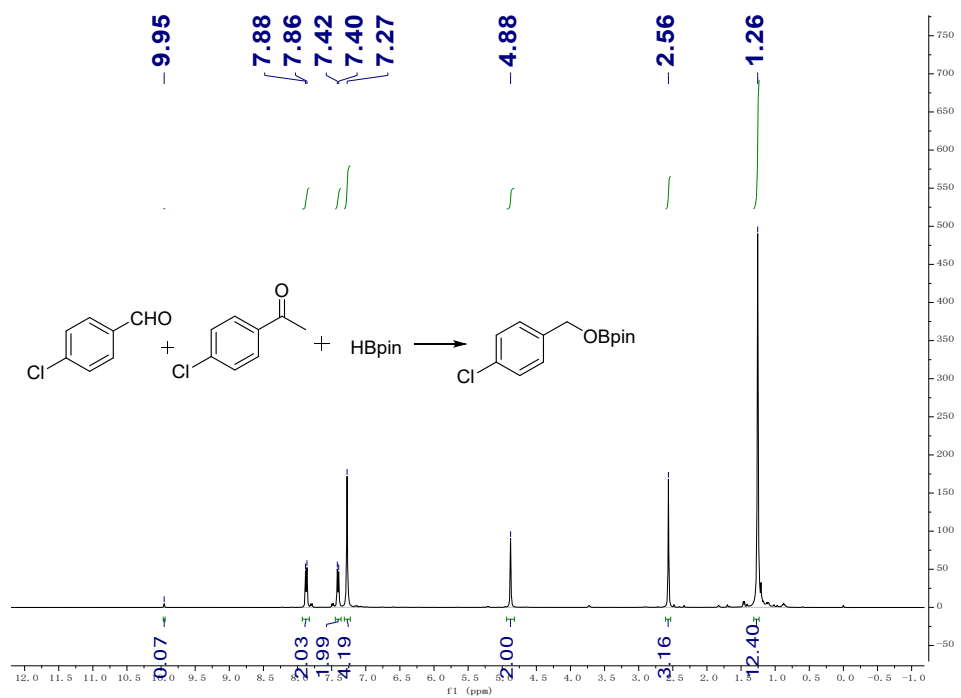

**Fig. S33** <sup>1</sup>H NMR spectrum of the products of the reaction of 4-chlorobenzaldehyde and 1-(4-chlorophenyl)ethan-1-one with HBpin in a 1:1:1 molar ratio.

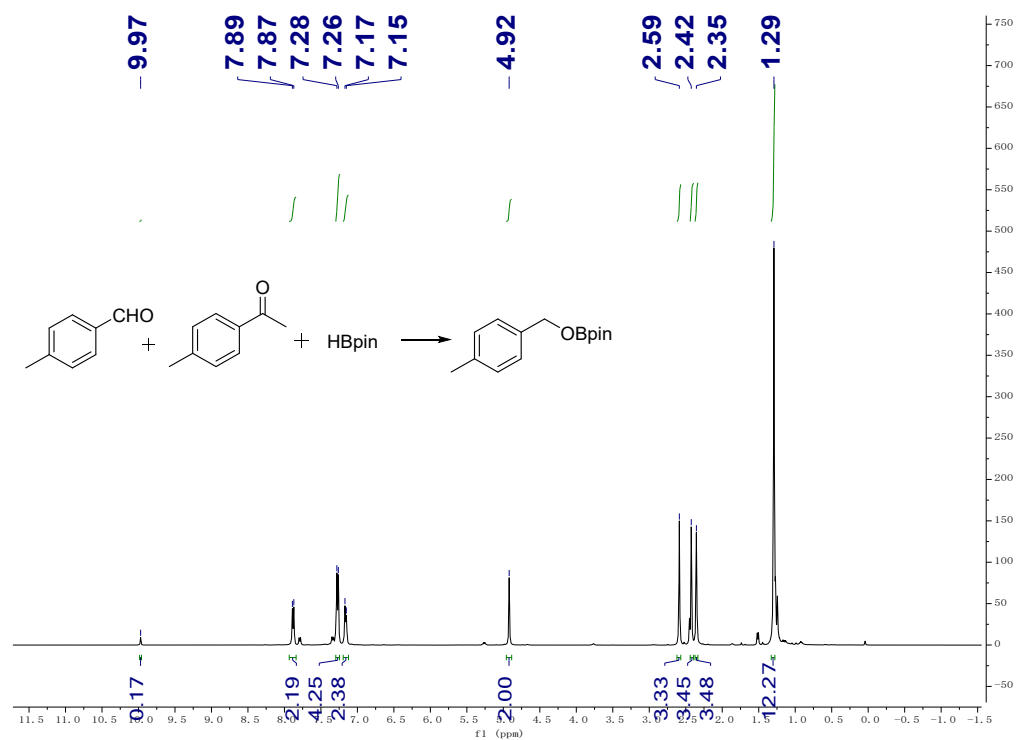

**Fig. S34**  $^1\text{H}$  NMR spectrum of the products of the reaction of 4-methylbenzaldehyde and 1-(p-tolyl)ethan-1-one with HBpin in a 1:1:1 molar ratio.

## 6. Stoichiometric reactions of complex 1 with benzaldehyde and HBpin

(a)

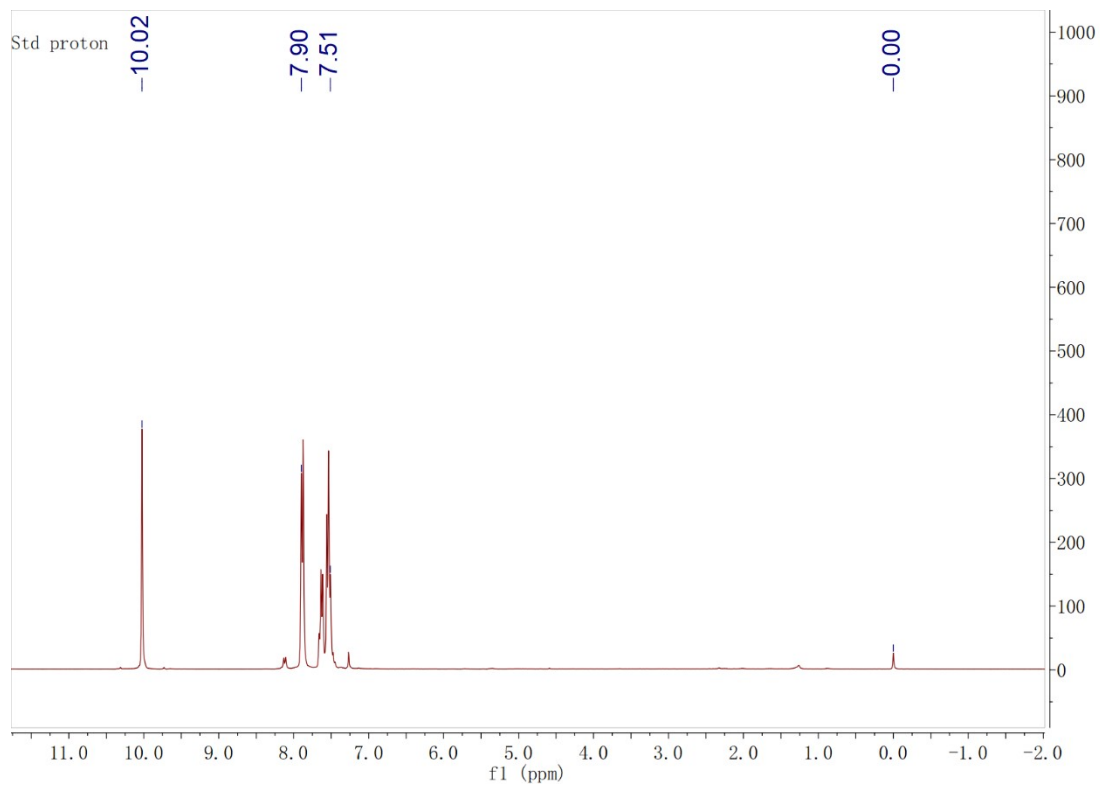

(b)

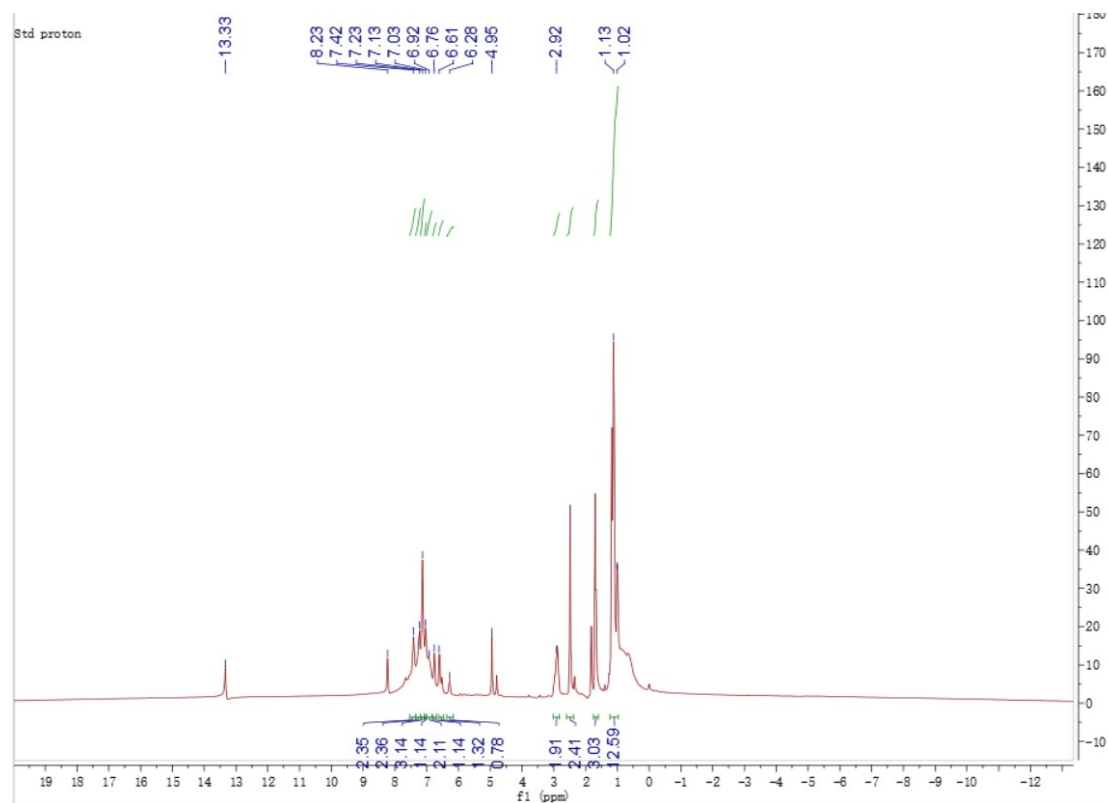

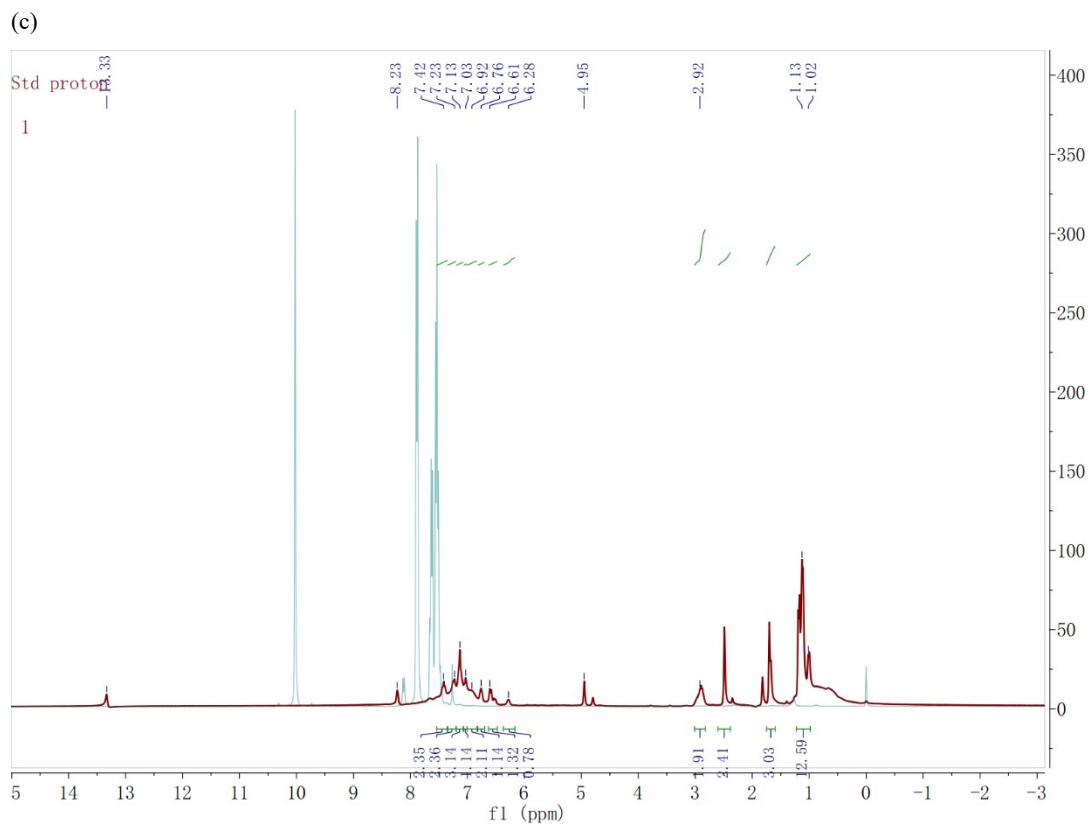

**Fig. S35**  $^1\text{H}$  NMR spectra for the stoichiometric reaction of complex **1** with benzaldehyde. (a)  $^1\text{H}$  NMR spectrum of benzaldehyde. (b)  $^1\text{H}$  NMR spectrum of the mixture of complex **1** and benzaldehyde after 60 minutes. (c) Superposition of (b) and (a).



(a)

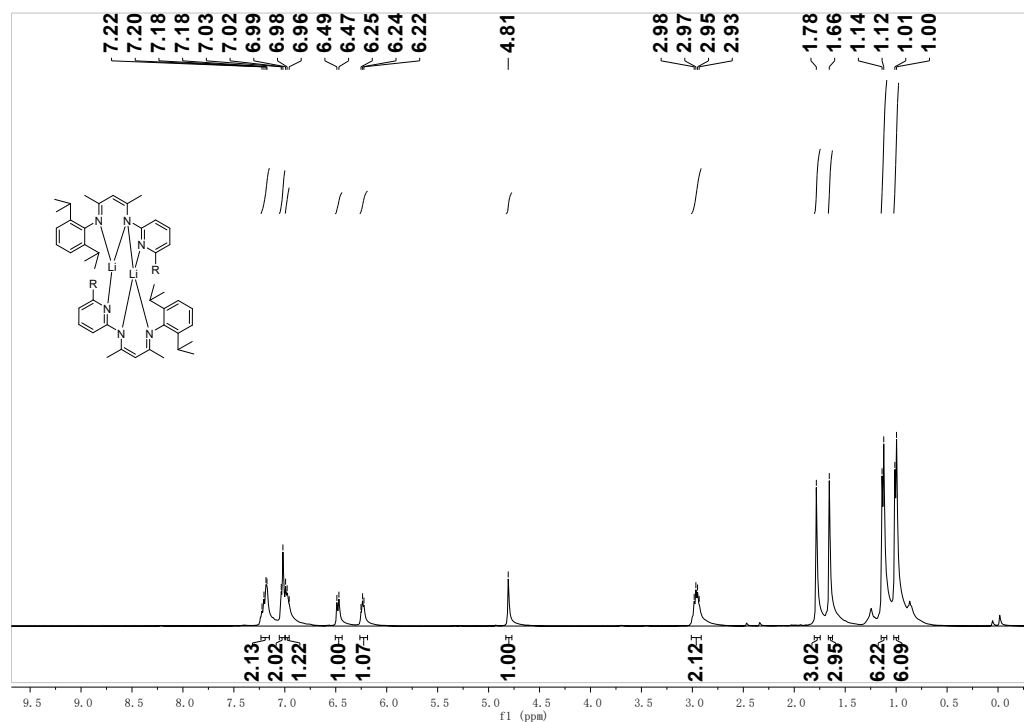

(b)

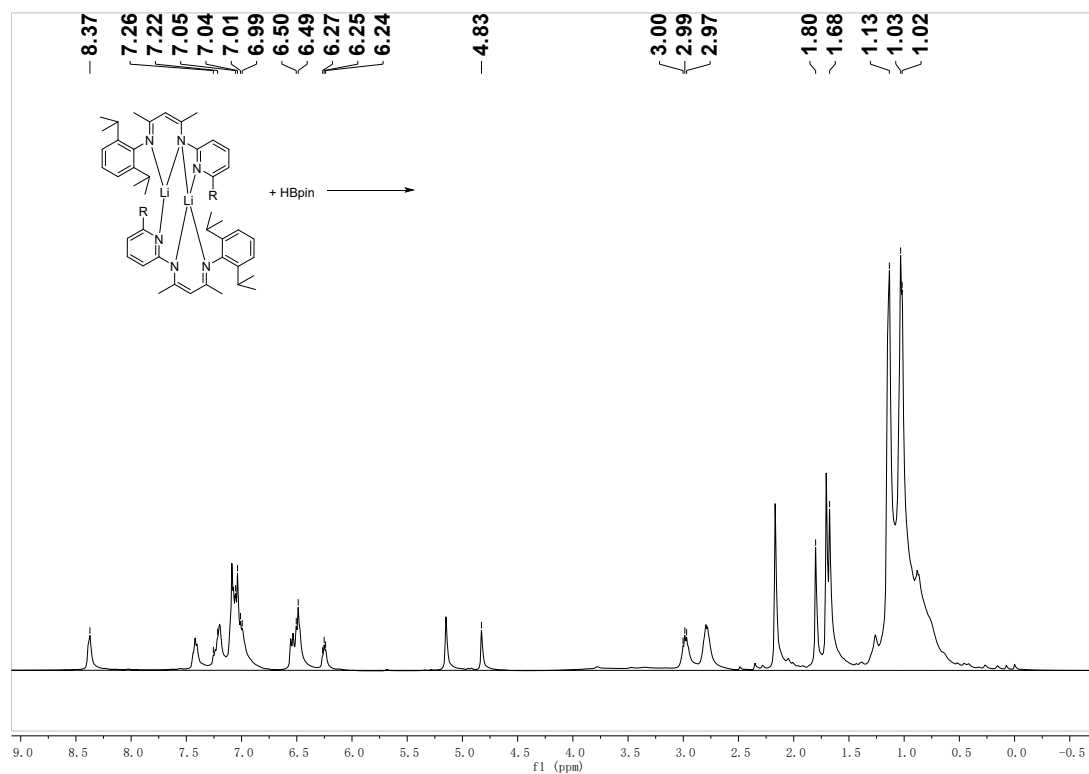

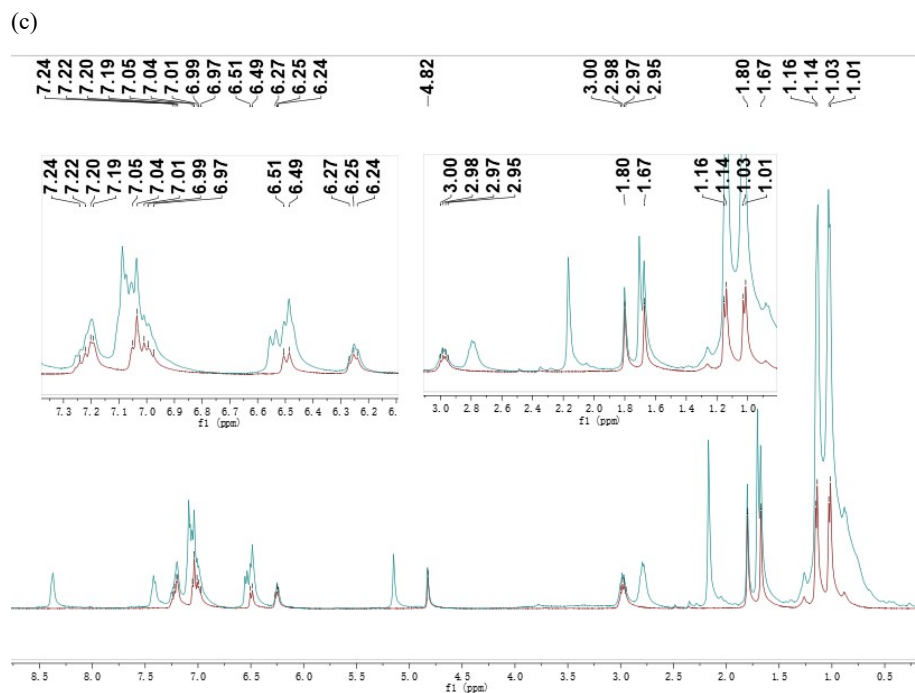

**Fig. S36** <sup>1</sup>H NMR spectra for the stoichiometric reaction of complex **1** with HBpin. (a) <sup>1</sup>H NMR spectrum of complex **1**. (b) <sup>1</sup>H NMR spectrum of the mixture of complex **1** and HBpin. (c) Superposition of (b) and (a).

## 7. Gram-scale synthesis of **8f** catalyzed by complex **2**

Magnetic stir bar, 1-(*p*-tolyl)ethanone (**6f**) (2.0 g, 14.9 mmol, 1.0 equiv), and catalyst (**2**) (19.5 mg, 0.03 mmol, 0.2 mol% ) were placed in a round-bottom flask and following flushing with argon gas. After cooling with ice bath, HBpin (1.91 g, 14.9 mmol, 1.0 equiv) was added dropwise through a syringe. After stirring for 30 min at room temperature, additional HBpin (573 mg, 4.47 mmol, 0.3 equiv) was added, and the reaction was stirred for 1 h and monitored with TLC. After 1-(*p*-tolyl)ethanone (**6f**) was consumed completely, NaOH (20 mL, 2M in water) and THF (20 mL) were added. The reaction was stirred for 1.5 h at room temperature. The solvent of THF was evaporated and the water phase was extracted with CH<sub>2</sub>Cl<sub>2</sub> (30 mL x 3). The combined organic layers were washed with brine dried with anhydrous Na<sub>2</sub>SO<sub>4</sub> and concentrated under vacuum. The crude product was purified by silicon gel column with ethyl acetate in petroleum ether (5% to 10%) to afford 1-(*p*-tolyl)ethanol (**8f**) (1.87 g, 13.7 mmol, 92% yield) as a colorless oil; <sup>1</sup>H NMR (500 MHz, CDCl<sub>3</sub>) δ 7.27 (d, *J* = 8.0 Hz, 2H), 7.16 (d, *J* = 7.9 Hz, 2H), 4.87 (q, *J* = 6.5 Hz, 1H), 2.34 (s, 3H), 1.78 (s, 1H), 1.48 (d, *J* = 6.5 Hz, 3H); <sup>13</sup>C NMR (126 MHz, CDCl<sub>3</sub>) δ 142.9, 137.2, 129.2, 125.4, 70.3, 25.1, 21.1.

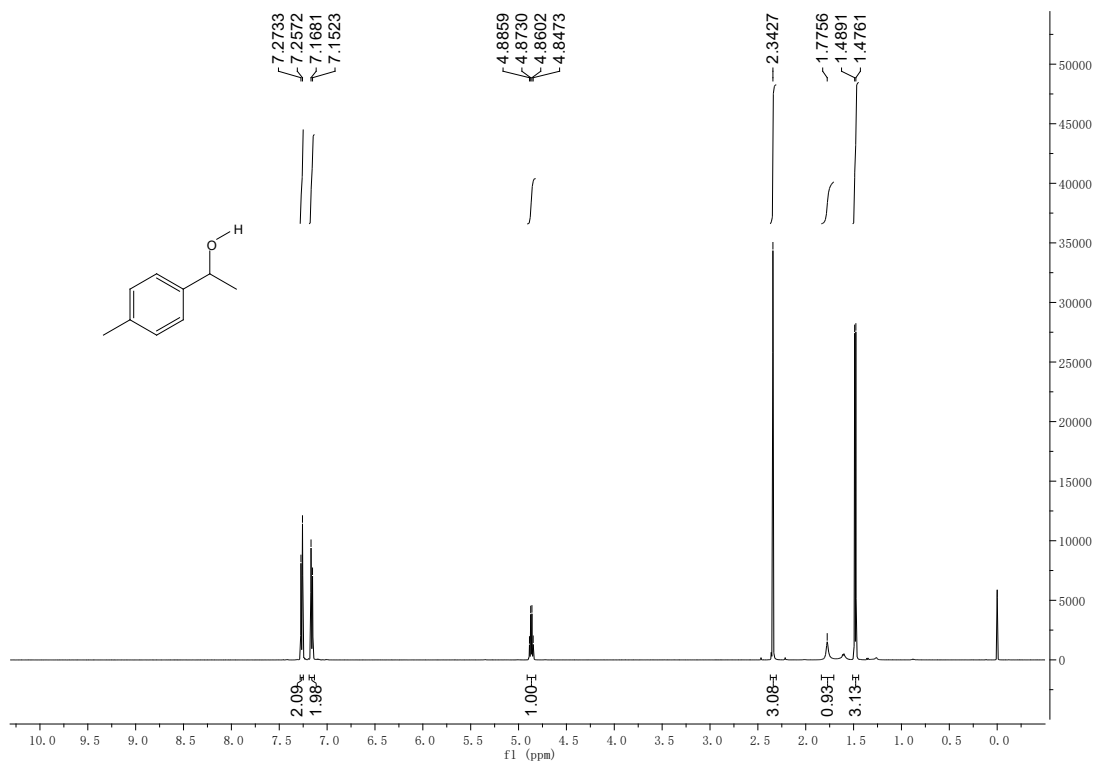

**Fig. S37**  $^1\text{H}$  NMR spectrum for **8f**.

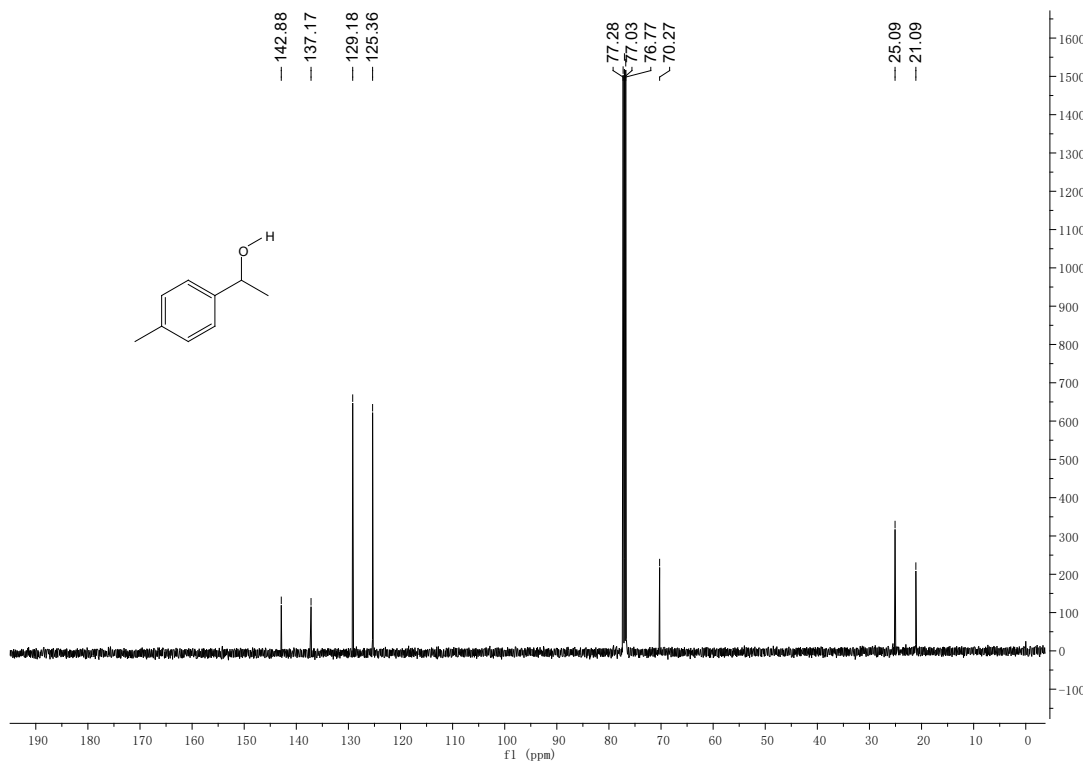

**Fig. S38**  $^{13}\text{C}$  NMR spectrum for **8f**.

## 8. Crystallographic data and structure refinements for complexes 1-3

Table S1 Crystallographic data and structure refinements for complexes 1-3

|                                                                 | 1                                                                   | 2                                                                   | 3                                                                   |
|-----------------------------------------------------------------|---------------------------------------------------------------------|---------------------------------------------------------------------|---------------------------------------------------------------------|
| Empirical formula                                               | C <sub>44</sub> H <sub>56</sub> Li <sub>2</sub> N <sub>6</sub>      | C <sub>184</sub> H <sub>240</sub> Li <sub>8</sub> N <sub>24</sub>   | C <sub>49</sub> H <sub>67</sub> MgN <sub>6</sub>                    |
| Formula weight                                                  | 682.82                                                              | 2843.51                                                             | 764.39                                                              |
| Temperature [K]                                                 | 189.0                                                               | 120.02                                                              | 296.15                                                              |
| Crystal system                                                  | monoclinic                                                          | triclinic                                                           | monoclinic                                                          |
| Space group                                                     | <i>P2<sub>1</sub>/c</i>                                             | P-1                                                                 | <i>C2/c</i>                                                         |
| <i>a</i> /Å                                                     | 11.2500(8)                                                          | 19.401(3)                                                           | 17.8797(11)                                                         |
| <i>b</i> /Å                                                     | 17.6853(11)                                                         | 19.525(3)                                                           | 21.1458(13)                                                         |
| <i>c</i> /Å                                                     | 21.0440(15)                                                         | 25.019(3)                                                           | 24.3580(15)                                                         |
| $\alpha$ /°                                                     | 90                                                                  | 105.371(3)                                                          | 90                                                                  |
| $\beta$ /°                                                      | 93.665(2)                                                           | 105.614(3)                                                          | 96.658(2)                                                           |
| $\gamma$ /°                                                     | 90                                                                  | 97.599(4)                                                           | 90                                                                  |
| Volume/Å <sup>3</sup>                                           | 4178.3(5)                                                           | 8587.0(19)                                                          | 9147.2(10)                                                          |
| Z                                                               | 4                                                                   | 2                                                                   | 8                                                                   |
| $\rho_{\text{calc}}$ /cm <sup>3</sup>                           | 1.085                                                               | 1.100                                                               | 1.110                                                               |
| $\mu$ /mm <sup>-1</sup>                                         | 0.063                                                               | 0.064                                                               | 0.078                                                               |
| <i>F</i> (000)                                                  | 1472.0                                                              | 3072.0                                                              | 3320.0                                                              |
| Crystal size/mm <sup>3</sup>                                    | 0.18 × 0.04 × 0.02                                                  | 0.25 × 0.2 × 0.1                                                    | 0.16 × 0.03 × 0.02                                                  |
| Radiation                                                       | Mo-K $\alpha$<br>( $\lambda$ = 0.71073 )                            | Mo-K $\alpha$<br>( $\lambda$ = 0.71073)                             | Mo-K $\alpha$<br>( $\lambda$ = 0.71073)                             |
| 2 $\theta$ range for data collection/°                          | 5.864<br>to 50                                                      | 3.252<br>to 50                                                      | 5.118<br>to 55.162                                                  |
| Index ranges                                                    | -13 ≤ <i>h</i> ≤ 13,<br>-21 ≤ <i>k</i> ≤ 21,<br>-25 ≤ <i>l</i> ≤ 25 | -23 ≤ <i>h</i> ≤ 23,<br>-23 ≤ <i>k</i> ≤ 23,<br>-29 ≤ <i>l</i> ≤ 29 | -23 ≤ <i>h</i> ≤ 23,<br>-25 ≤ <i>k</i> ≤ 27,<br>-31 ≤ <i>l</i> ≤ 29 |
| Reflections collected                                           | 50327                                                               | 158605                                                              | 86204                                                               |
| Independent reflections                                         | 7330<br>[ <i>R</i> <sub>int</sub> = 0.1065]                         | 30173<br>[ <i>R</i> <sub>int</sub> = 0.1245],                       | 10512<br>[ <i>R</i> <sub>int</sub> = 0.0885]                        |
| Data/restraints/parameters                                      | 7330/0/481                                                          | 30173/3520/2001                                                     | 10512/47/520                                                        |
| Goodness-of-fit on <i>F</i> <sup>2</sup>                        | 1.098                                                               | 1.036                                                               | 0.993                                                               |
| Final <i>R</i> indexes<br>[ <i>I</i> ≥ 2 $\sigma$ ( <i>I</i> )] | <i>R</i> <sub>1</sub> = 0.0588,<br><i>wR</i> <sub>2</sub> = 0.1481  | <i>R</i> <sub>1</sub> = 0.1733,<br><i>wR</i> <sub>2</sub> = 0.4196  | <i>R</i> <sub>1</sub> = 0.0690,<br><i>wR</i> <sub>2</sub> = 0.1791  |
| Final <i>R</i> indexes<br>[all data]                            | <i>R</i> <sub>1</sub> = 0.1130,<br><i>wR</i> <sub>2</sub> = 0.1686  | <i>R</i> <sub>1</sub> = 0.2238,<br><i>wR</i> <sub>2</sub> = 0.4358  | <i>R</i> <sub>1</sub> = 0.1233,<br><i>wR</i> <sub>2</sub> = 0.2119  |
| Largest diff. peak/hole/e Å <sup>-3</sup>                       | 0.29/-0.22                                                          | 0.57/-0.47                                                          | 1.17/-0.95                                                          |

## 9. Selected bond lengths [Å] and angles [°] for complexes 1-3

**Table S2** Selected bond lengths [Å] and angles [°] for complexes 1-3

| Complex 1 |            |            |            |
|-----------|------------|------------|------------|
| N1–Li1    | 1.934(4)   | N3–Li2     | 1.971(4)   |
| N2–Li1    | 1.960(4)   | N6–Li1     | 1.975(4)   |
| N5–Li1    | 2.381(4)   | N5–Li2     | 1.986(4)   |
| N4–Li2    | 1.921(4)   |            |            |
| N1–Li1–N5 | 134.8(2)   | Li2–N5–Li1 | 74.42(16)  |
| N4–Li2–N5 | 99.23(18)  | N4–Li2–N3  | 141.6(2)   |
| N3–Li2–N5 | 111.3(2)   | N6–Li1–N5  | 62.90(12)  |
| N6–Li1–N2 | 107.49(18) | N1–Li1–N6  | 138.3(2)   |
| N1–Li1–N2 | 99.80(17)  | N2–Li1–N5  | 109.63(18) |
| Complex 2 |            |            |            |
| N1–Li1    | 1.964(16)  | N3–Li2     | 2.023(15)  |
| N2–Li1    | 1.979(15)  | N6–Li1     | 2.053(15)  |
| N5–Li1    | 2.384(15)  | N5–Li2     | 1.957(15)  |
| N4–Li2    | 1.982(15)  |            |            |
| N1–Li1–N5 | 133.5(7)   | Li2–N5–Li1 | 76.3(6)    |
| N4–Li2–N5 | 97.6(6)    | N4–Li2–N3  | 146.4(8)   |
| N3–Li2–N5 | 112.0(7)   | N6–Li1–N5  | 61.8(4)    |
| N6–Li1–N2 | 107.3(7)   | N1–Li1–N6  | 140.5(8)   |
| N1–Li1–N2 | 99.3(6)    | N2–Li1–N5  | 110.8(7)   |
| Complex 3 |            |            |            |
| Mg1–N1    | 2.232(2)   | Mg1–N4     | 2.314(2)   |
| Mg1–N2    | 2.056(2)   | Mg1–N5     | 2.054(2)   |
| Mg1–N3    | 2.324(2)   | Mg1–N6     | 2.234(2)   |
| N1–Mg1–N2 | 87.25(6)   | N4–Mg1–N2  | 107.79(8)  |
| N1–Mg1–N3 | 142.57(8)  | N4–Mg1–N6  | 141.95(8)  |
| N1–Mg1–N4 | 96.68(8)   | N1–Mg1–N5  | 102.65(8)  |
| N1–Mg1–N6 | 108.34(8)  | N2–Mg1–N5  | 165.28(9)  |
| N2–Mg1–N6 | 101.73(8)  | N3–Mg1–N5  | 106.28(8)  |
| N2–Mg1–N3 | 60.47(7)   | N4–Mg1–N5  | 60.71(8)   |
| N4–Mg1–N3 | 77.76(7)   | N6–Mg1–N5  | 85.61(8)   |
| N6–Mg1–N3 | 97.17(7)   |            |            |

## 10. Molecular structure of complex 2

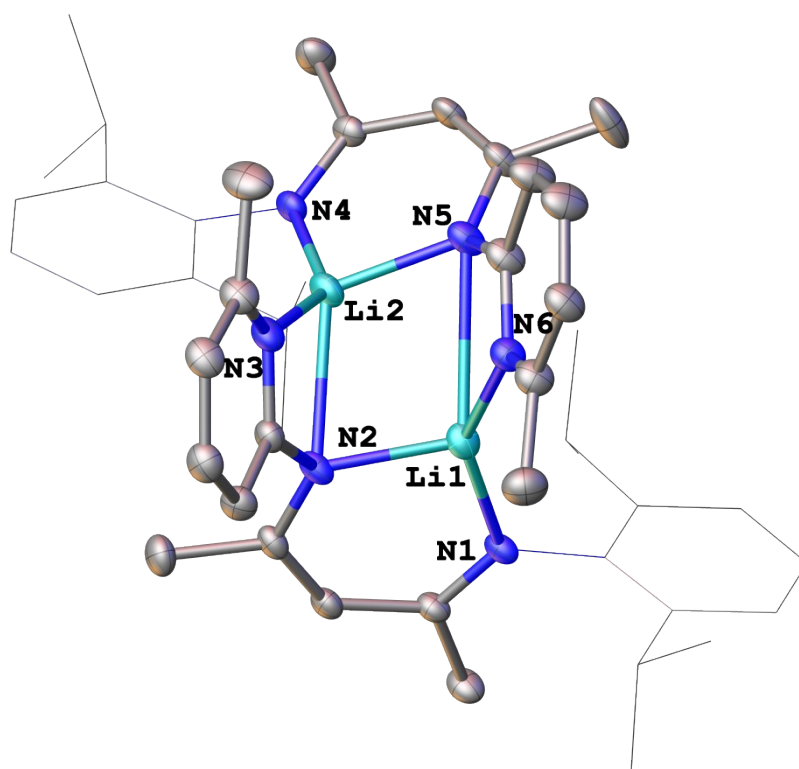

(a)

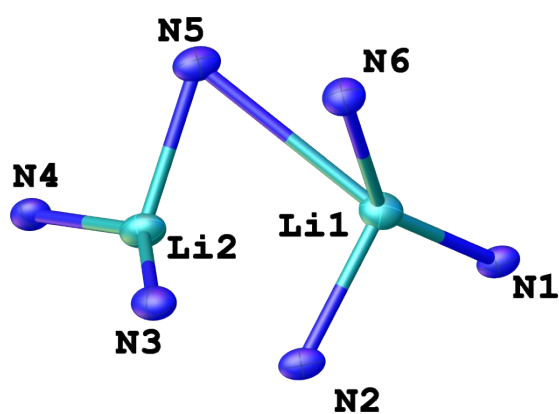

(b)

**Fig. S39** (a) ORTEP drawing of **2** with thermal ellipsoids drawn at the 30% probability level. Hydrogen atoms are omitted for clarity. (b) Coordination polyhedron of lithium ions.

## 11. Computational details and results

All DFT calculations were carried out with the Gaussian 09 suite of computational programs.[1] The geometries of all stationary points were optimized using the B3LYP hybrid functional at the basis set level of 6-31G(d). Frequencies were analytically computed at the same level of theory to obtain the free energies and to confirm whether the structures are minima (no imaginary frequency) or transition states (only one imaginary frequency). The solvent effect of toluene was evaluated by using the SMD polarizable continuum model by carrying out single point calculations at the M06/6-311+G(d,p) level. All transition state structures were confirmed to connect the proposed reactants and products by intrinsic reaction coordinate (IRC) calculations. All the energies given in the text are relative free energies corrected with solvation effects.

[1] Gaussian 09, Revision A.01, M. J. Frisch, G. W. Trucks, H. B. Schlegel, G. E. Scuseria, M. A. Robb, J. R. Cheeseman, G. Scalmani, V. Barone, B. Mennucci, G. A. Petersson, H. Nakatsuji, M. Caricato, X. Li, H. P. Hratchian, A. F. Izmaylov, J. Bloino, G. Zheng, J. L. Sonnenberg, M. Hada, M. Ehara, K. Toyota, R. Fukuda, J. Hasegawa, M. Ishida, T. Nakajima, Y. Honda, O. Kitao, H. Nakai, T. Vreven, J. A. Montgomery, Jr., J. E. Peralta, F. Ogliaro, M. Bearpark, J. J. Heyd, E. Brothers, K. N. Kudin, V. N. Staroverov, R. Kobayashi, J. Normand, K. Raghavachari, A. Rendell, J. C. Burant, S. S. Iyengar, J. Tomasi, M. Cossi, N. Rega, J. M. Millam, M. Klene, J. E. Knox, J. B. Cross, V. Bakken, C. Adamo, J. Jaramillo, R. Gomperts, R. E. Stratmann, O. Yazyev, A. J. Austin, R. Cammi, C. Pomelli, J. W. Ochterski, R. L. Martin, K. Morokuma, V. G. Zakrzewski, G. A. Voth, P. Salvador, J. J. Dannenberg, S. Dapprich, A. D. Daniels, Ö. Farkas, J. B. Foresman, J. V. Ortiz, J. Cioslowski, D. J. Fox, Gaussian, Inc., Wallingford CT, 2009.

**Table S3.** Calculated Energies (in Hartree)

| Species      | $G_{298}^a$  | $E^b$        | $E_{Sol}^c$  |
|--------------|--------------|--------------|--------------|
| <b>1</b>     | -2053.369038 | -2054.194054 | -2053.177088 |
| <b>1'</b>    | -1026.679443 | -1027.078415 | -1026.566717 |
| <b>4g</b>    | -345.493771  | -345.5734477 | -345.4220617 |
| <b>IN1</b>   | -1372.174265 | -1372.672319 | -1372.010389 |
| <b>HBpin</b> | -411.712156  | -411.8705623 | -411.7159823 |
| <b>IN2</b>   | -1783.872176 | -1784.552778 | -1783.746669 |
| <b>TS1</b>   | -1783.8501   | -1784.53417  | -1783.727181 |
| <b>IN3</b>   | -1783.91899  | -1784.609227 | -1783.803014 |
| <b>5g</b>    | -757.241925  | -757.5055264 | -757.201211  |

<sup>a</sup> Sum of electronic and thermal free energies

<sup>b</sup> Electronic energies

<sup>c</sup> Single point energies in solution

### Cartesian Coordinates for All Species

**1**

C

1.31255200 -0.66348500 0.52693000

|   |            |             |             |    |             |             |             |
|---|------------|-------------|-------------|----|-------------|-------------|-------------|
| C | 2.38663500 | 0.22217400  | 0.67461800  | C  | 8.62683800  | 1.72026700  | 4.03889700  |
| C | 3.04090900 | 0.70399400  | -0.48903500 | H  | 6.92131800  | 2.85973500  | 3.38883800  |
| C | 2.61463600 | 0.27863900  | -1.77235900 | C  | 9.64813900  | 0.43175000  | 2.31521300  |
| C | 1.52793700 | -0.59956100 | -1.86461700 | C  | 9.62217700  | 0.81615600  | 3.64869800  |
| C | 0.87623600 | -1.07282400 | -0.72969200 | H  | 8.55012200  | 2.04292600  | 5.07451500  |
| H | 0.80647400 | -1.03707300 | 1.41408500  | H  | 10.40620600 | -0.26046800 | 1.95583400  |
| H | 1.18667000 | -0.91988500 | -2.84602000 | H  | 10.34864000 | 0.42263700  | 4.35127400  |
| H | 0.03547900 | -1.75525500 | -0.82384300 | N  | 8.78458800  | 0.87998500  | 1.38738600  |
| C | 3.29710000 | 0.76501100  | -3.04885600 | Li | 5.99804700  | 0.73063000  | -0.27704400 |
| C | 2.38290000 | 1.70190400  | -3.86432700 | C  | 13.89243800 | -0.26135200 | 0.52513200  |
| C | 3.78194600 | -0.40389800 | -3.92685800 | C  | 12.78963100 | -0.31224100 | -0.33600900 |
| H | 4.17816600 | 1.34224800  | -2.75067200 | C  | 12.07020300 | 0.88308400  | -0.59726100 |
| H | 2.07346400 | 2.57428200  | -3.27904300 | C  | 12.45887200 | 2.09679800  | 0.02330500  |
| H | 2.90260200 | 2.06382000  | -4.75995500 | C  | 13.57761300 | 2.09536000  | 0.86502900  |
| H | 1.47428300 | 1.18216200  | -4.19221300 | C  | 14.29484600 | 0.93045900  | 1.12056400  |
| H | 4.44659000 | -1.07223800 | -3.36985400 | H  | 14.44901700 | -1.17314200 | 0.72880800  |
| H | 2.94422000 | -1.00354200 | -4.30235100 | H  | 13.89204400 | 3.02621400  | 1.33034100  |
| H | 4.32712300 | -0.02316000 | -4.79923800 | H  | 15.15932300 | 0.95113500  | 1.77913000  |
| C | 2.83184600 | 0.63017900  | 2.07825300  | C  | 11.70360700 | 3.40099100  | -0.22037000 |
| C | 3.41023900 | -0.56578000 | 2.86013700  | C  | 12.52352300 | 4.38094100  | -1.08410000 |
| C | 1.69602000 | 1.29982500  | 2.87581200  | C  | 11.27470700 | 4.07841400  | 1.09469700  |
| H | 3.63697500 | 1.36262500  | 1.97436000  | H  | 10.79350300 | 3.15440500  | -0.77686000 |
| H | 4.26665900 | -1.00652000 | 2.33681000  | H  | 12.78782000 | 3.94216800  | -2.05199500 |
| H | 3.75200700 | -0.24941000 | 3.85327400  | H  | 11.95306900 | 5.29839200  | -1.27446500 |
| H | 2.66232600 | -1.35564600 | 3.00016000  | H  | 13.45615600 | 4.66493300  | -0.58129600 |
| H | 1.28397300 | 2.16068400  | 2.33777600  | H  | 10.68008700 | 3.40165300  | 1.71707600  |
| H | 0.87075100 | 0.60394100  | 3.06791400  | H  | 12.13895300 | 4.40267900  | 1.68661900  |
| H | 2.06442400 | 1.65035600  | 3.84761300  | H  | 10.67271800 | 4.97060500  | 0.88337500  |
| C | 4.08607400 | 2.83465100  | -0.22287200 | C  | 12.38947100 | -1.64991900 | -0.95737700 |
| C | 5.18419000 | 3.69047500  | 0.10925400  | C  | 11.90870900 | -2.65108800 | 0.11118100  |
| C | 6.41106600 | 3.37241600  | 0.68753500  | C  | 13.52808300 | -2.26080800 | -1.79783100 |
| H | 4.96589600 | 4.75210900  | 0.04444500  | H  | 11.54633900 | -1.46816500 | -1.62934800 |
| N | 4.19460600 | 1.52989800  | -0.35088700 | H  | 11.05089700 | -2.25697300 | 0.66847400  |
| C | 2.74713700 | 3.54594500  | -0.36128100 | H  | 11.60026400 | -3.59521800 | -0.35432000 |
| H | 2.88104000 | 4.52637100  | -0.82884700 | H  | 12.70093500 | -2.87836500 | 0.83455200  |
| H | 2.02933800 | 2.96679200  | -0.94482100 | H  | 13.86758700 | -1.56698800 | -2.57479500 |
| H | 2.30761200 | 3.71883100  | 0.62953700  | H  | 14.39736200 | -2.51432300 | -1.17921400 |
| C | 7.22421200 | 4.56503000  | 1.18730200  | H  | 13.19162100 | -3.18245000 | -2.28811800 |
| H | 7.08232100 | 5.41390700  | 0.51144800  | C  | 10.96313700 | 0.91121100  | -2.71274500 |
| H | 6.90643700 | 4.89441600  | 2.18354200  | C  | 9.84965500  | 0.67326900  | -3.58017800 |
| H | 8.29145300 | 4.33709000  | 1.23642500  | C  | 8.65369800  | 0.00603500  | -3.32489300 |
| N | 6.90727200 | 2.11691500  | 0.77734600  | H  | 10.03235300 | 0.91035000  | -4.62397000 |
| C | 7.81743900 | 1.76515400  | 1.75012800  | N  | 10.89422000 | 0.83138500  | -1.40156100 |
| C | 7.72455200 | 2.19147000  | 3.10000500  | C  | 12.27037200 | 1.21194100  | -3.43368700 |



|           |             |             |             |           |             |             |             |
|-----------|-------------|-------------|-------------|-----------|-------------|-------------|-------------|
| H         | 12.70463900 | 0.28504600  | -3.82958700 | H         | -0.90290200 | 0.74970100  | 3.65137100  |
| H         | 12.09026100 | 1.87162200  | -4.28861700 | C         | -0.89021500 | -1.33428100 | 0.84306400  |
| H         | 13.01032700 | 1.67268500  | -2.77724200 | H         | -0.57819600 | -1.24632400 | -0.20382400 |
| C         | 7.82182500  | -0.33594900 | -4.55941100 | H         | -0.31030500 | -2.14372200 | 1.30232200  |
| H         | 7.93186700  | 0.45514500  | -5.30729900 | H         | -1.94254700 | -1.64161700 | 0.85139300  |
| H         | 8.14814400  | -1.26987700 | -5.03180100 | N         | 0.69075600  | 2.54061100  | 1.21928400  |
| H         | 6.76122500  | -0.43788000 | -4.31748400 | C         | 1.72886700  | 2.24997300  | 0.44830500  |
| N         | 8.19932700  | -0.29562800 | -2.08661800 | C         | 1.49591500  | 1.75779600  | -0.97377900 |
| C         | 7.32824800  | -1.34156800 | -1.87090800 | H         | 0.88527100  | 0.84794100  | -0.97751500 |
| C         | 7.45562200  | -2.60669800 | -2.50001200 | H         | 0.94470200  | 2.50367500  | -1.55786700 |
| C         | 6.59261100  | -3.63679800 | -2.16609700 | H         | 2.43680400  | 1.54514100  | -1.48597800 |
| H         | 8.25485100  | -2.76226100 | -3.21573800 | C         | 3.09859000  | 2.36296300  | 0.84254300  |
| C         | 5.54280600  | -2.16591100 | -0.61382600 | H         | 3.81720000  | 2.07731200  | 0.08231400  |
| C         | 5.60206900  | -3.42252000 | -1.20016200 | C         | 3.63587700  | 2.79053900  | 2.06288900  |
| H         | 6.69591400  | -4.60784300 | -2.64450300 | C         | 5.14770700  | 2.80598000  | 2.19479800  |
| H         | 4.78719700  | -1.94339900 | 0.13608400  | H         | 5.47900400  | 2.15670900  | 3.01449700  |
| H         | 4.90469900  | -4.20068700 | -0.90976600 | H         | 5.62656700  | 2.45953600  | 1.27564100  |
| N         | 6.36921100  | -1.15182100 | -0.92491300 | H         | 5.51586700  | 3.81724400  | 2.40738500  |
| Li        | 9.12005600  | 0.56073600  | -0.58100600 | N         | 2.80852300  | 3.16039200  | 3.04273000  |
| <b>1'</b> |             |             |             | C         | 1.75287100  | 4.30264700  | 6.16950100  |
| C         | -2.69004100 | 1.10613600  | 0.57530500  | C         | 2.88641800  | 4.56527900  | 6.93574000  |
| C         | -1.34252000 | 1.18096100  | 0.94603600  | C         | 4.12911200  | 4.33414300  | 6.33995500  |
| C         | -0.64248800 | 2.39614100  | 0.73360400  | C         | 4.20639300  | 3.86140300  | 5.03625200  |
| C         | -1.30621000 | 3.51045000  | 0.16072900  | C         | 3.01149900  | 3.61581000  | 4.31419600  |
| C         | -2.65456300 | 3.38370700  | -0.19328100 | N         | 1.79714400  | 3.84909900  | 4.91671800  |
| C         | -3.34800800 | 2.19361300  | 0.00714300  | H         | 5.04533200  | 4.52343500  | 6.89455600  |
| H         | -3.23624000 | 0.18019700  | 0.73697600  | H         | 0.75727300  | 4.46380500  | 6.57998600  |
| H         | -3.17201900 | 4.23367500  | -0.63134100 | H         | 2.79686200  | 4.93396800  | 7.95186700  |
| H         | -4.39481500 | 2.11473200  | -0.27448200 | H         | 5.17191200  | 3.68616800  | 4.58348900  |
| C         | -0.59232300 | 4.84635700  | -0.03310900 | Li        | 0.92177800  | 3.19030600  | 3.04340200  |
| H         | 0.47486500  | 4.68065000  | 0.14123800  | <b>4g</b> |             |             |             |
| C         | -1.06767700 | 5.88131200  | 1.00695500  | C         | -1.37705900 | -0.31516800 | 0.00000600  |
| H         | -0.90771100 | 5.52176000  | 2.03118600  | C         | 0.01698100  | -0.29895600 | 0.00057400  |
| H         | -0.52365900 | 6.82701100  | 0.89374100  | C         | 0.70671600  | 0.92036800  | 0.00012200  |
| H         | -2.13842600 | 6.09144600  | 0.89670600  | C         | -0.00776800 | 2.12836600  | -0.00090500 |
| C         | -0.74311000 | 5.40399100  | -1.46063000 | C         | -1.39830500 | 2.11139500  | -0.00147300 |
| H         | -0.14852300 | 6.31800500  | -1.57696200 | C         | -2.08303100 | 0.89008600  | -0.00101600 |
| H         | -0.40240000 | 4.68098300  | -2.21037900 | H         | -1.91211900 | -1.26064600 | 0.00035900  |
| H         | -1.78369100 | 5.65825900  | -1.69408800 | H         | 0.57758900  | -1.23167200 | 0.00137400  |
| C         | -0.66655300 | -0.01732300 | 1.60894900  | H         | 0.54948900  | 3.06025400  | -0.00124000 |
| H         | 0.41048400  | 0.17334800  | 1.62066900  | H         | -1.95429700 | 3.04489200  | -0.00227200 |
| C         | -1.11788600 | -0.15996000 | 3.07691000  | H         | -3.16981100 | 0.87966200  | -0.00146200 |
| H         | -2.19726200 | -0.34297400 | 3.14320600  | C         | 2.18702600  | 0.92888500  | 0.00072700  |
| H         | -0.60160800 | -0.99546400 | 3.56535800  |           |             |             |             |

|            |             |             |             |              |             |             |             |
|------------|-------------|-------------|-------------|--------------|-------------|-------------|-------------|
| H          | 2.65553300  | -0.08104700 | 0.00165700  | H            | 5.52493400  | 1.12010100  | 1.06055400  |
| O          | 2.87526800  | 1.93167800  | 0.00028600  | H            | 6.02613900  | 2.72872200  | 1.59011400  |
|            |             |             |             | N            | 3.32957600  | 2.99888900  | 2.81610700  |
| <b>IN1</b> |             |             |             | C            | 3.27467400  | 4.11177500  | 6.13827800  |
| C          | -2.75785600 | 2.05034100  | 1.33408400  | C            | 4.58704900  | 4.39497500  | 6.51421200  |
| C          | -1.38138800 | 1.84964400  | 1.49748300  | C            | 5.57941100  | 4.21063600  | 5.54891400  |
| C          | -0.47604100 | 2.80926300  | 0.96902200  | C            | 5.24437000  | 3.73815600  | 4.28621900  |
| C          | -0.97597700 | 3.93917300  | 0.26731100  | C            | 3.89063300  | 3.43450300  | 3.99288900  |
| C          | -2.36099100 | 4.09492500  | 0.13308300  | N            | 2.92738600  | 3.65695300  | 4.93482500  |
| C          | -3.25451300 | 3.16607200  | 0.66281900  | H            | 6.61748600  | 4.44307500  | 5.77611900  |
| H          | -3.45317800 | 1.31759500  | 1.73728500  | H            | 2.45455400  | 4.26224400  | 6.83956700  |
| H          | -2.74799500 | 4.96087500  | -0.39902400 | H            | 4.81575400  | 4.75945300  | 7.51042400  |
| H          | -4.32620100 | 3.30242900  | 0.54037400  | H            | 6.01176800  | 3.63131100  | 3.53232800  |
| C          | -0.03805600 | 4.99139700  | -0.32264700 | Li           | 1.44489800  | 3.45554600  | 3.07361100  |
| H          | 0.98383800  | 4.61706700  | -0.21672200 | C            | -4.14020300 | 6.82838300  | 4.80543900  |
| C          | -0.11302800 | 6.32111300  | 0.45386000  | C            | -3.38307100 | 5.82176200  | 4.21024200  |
| H          | 0.14947100  | 6.17959500  | 1.50723400  | C            | -1.99185900 | 5.78966900  | 4.39126100  |
| H          | 0.58210000  | 7.05562100  | 0.02882600  | C            | -1.36025800 | 6.77234300  | 5.17250400  |
| H          | -1.12129400 | 6.75206500  | 0.41108800  | C            | -2.11932900 | 7.77358600  | 5.76678000  |
| C          | -0.29411800 | 5.22784600  | -1.82354700 | C            | -3.50768300 | 7.80124000  | 5.58350100  |
| H          | 0.45263300  | 5.91871700  | -2.23299600 | H            | -5.21686900 | 6.85701800  | 4.66532900  |
| H          | -0.23883800 | 4.29348500  | -2.39340100 | H            | -3.85823900 | 5.06050200  | 3.59595300  |
| H          | -1.28216000 | 5.66755200  | -2.00537800 | H            | -0.28290400 | 6.72892300  | 5.29917200  |
| C          | -0.88088100 | 0.61889700  | 2.25196700  | H            | -1.63720200 | 8.53499000  | 6.37329200  |
| H          | 0.20848900  | 0.59780200  | 2.15822300  | H            | -4.09720400 | 8.58609800  | 6.04995200  |
| C          | -1.20537600 | 0.70514700  | 3.75682200  | C            | -1.21987300 | 4.71632600  | 3.75248000  |
| H          | -2.28810900 | 0.74657000  | 3.92976600  | H            | -1.80454000 | 3.96823000  | 3.19161000  |
| H          | -0.81474000 | -0.17095000 | 4.28845500  | O            | 0.00337500  | 4.61897200  | 3.81575900  |
| H          | -0.75856800 | 1.59706800  | 4.21169400  |              |             |             |             |
| C          | -1.42287700 | -0.69404000 | 1.65557700  | <b>HBpin</b> |             |             |             |
| H          | -1.18658100 | -0.77596200 | 0.58866600  | C            | -1.65307200 | 1.07174000  | 0.65444300  |
| H          | -0.98004300 | -1.55676300 | 2.16767500  | C            | -1.22463500 | -0.37835700 | 0.87074600  |
| H          | -2.51174200 | -0.77253500 | 1.76119000  | H            | -0.14993000 | -0.44249500 | 1.07660400  |
| N          | 0.90521100  | 2.70889300  | 1.27514000  | H            | -1.75917500 | -0.79263500 | 1.73148600  |
| C          | 1.74852700  | 2.11468100  | 0.44411100  | H            | -1.45148600 | -1.00170800 | 0.00303400  |
| C          | 1.23760800  | 1.53013000  | -0.86704800 | C            | -1.50769300 | 1.86403500  | 1.96029100  |
| H          | 0.44861900  | 0.79189200  | -0.68278900 | H            | -0.47506400 | 1.85644200  | 2.32477800  |
| H          | 0.79451600  | 2.30871400  | -1.49810100 | H            | -1.82381300 | 2.90410900  | 1.83319800  |
| H          | 2.03803400  | 1.04634200  | -1.43140900 | H            | -2.14617000 | 1.40939700  | 2.72388600  |
| C          | 3.13872300  | 1.94514000  | 0.69263700  | C            | -1.00439100 | 1.78941400  | -0.59485600 |
| H          | 3.67990500  | 1.40850300  | -0.07892900 | C            | -0.62883800 | 0.82646100  | -1.72896200 |
| C          | 3.89487900  | 2.32954700  | 1.81029300  | H            | -1.46240300 | 0.16422900  | -1.98320700 |
| C          | 5.35222700  | 1.89204500  | 1.81465500  | H            | -0.37840300 | 1.40944500  | -2.62057100 |
| H          | 5.64270100  | 1.48994300  | 2.79109700  | H            | 0.23682000  | 0.20973000  | -1.46540900 |

|   |             |            |             |   |            |            |             |
|---|-------------|------------|-------------|---|------------|------------|-------------|
| C | 0.17091500  | 2.71274900 | -0.27972700 | H | 0.67763500 | 2.68649800 | -1.38576900 |
| H | 0.51819100  | 3.18954200 | -1.20181000 | C | 1.92342100 | 2.31111000 | 0.90994300  |
| H | -0.11042000 | 3.50146700 | 0.42150300  | H | 2.34476300 | 1.91458400 | -0.00877800 |
| H | 1.00826800  | 2.14781300 | 0.14583200  | C | 2.69222100 | 2.09187200 | 2.05303400  |
| O | -3.07438100 | 1.08446000 | 0.32125200  | C | 4.01921400 | 1.37437400 | 1.79968700  |
| O | -2.10670300 | 2.60518700 | -1.09575100 | H | 3.91776400 | 0.28356500 | 1.84434800  |
| B | -3.26506400 | 2.06631000 | -0.61020200 | H | 4.38513300 | 1.62115900 | 0.79940600  |
| H | -4.34375000 | 2.42055300 | -0.96643900 | H | 4.78406600 | 1.66418100 | 2.52524600  |

## IN2

|   |             |             |             |    |             |             |            |
|---|-------------|-------------|-------------|----|-------------|-------------|------------|
| C | -3.70481800 | 3.47468100  | 1.95152200  | N  | 2.35638500  | 2.53070400  | 3.28278300 |
| C | -2.37774500 | 3.02869200  | 1.94442000  | C  | 3.90069000  | 2.63802100  | 6.52201300 |
| C | -1.34909200 | 3.94519700  | 1.59577900  | C  | 4.27095800  | 1.33533200  | 6.78464000 |
| C | -1.67874800 | 5.28412300  | 1.25971700  | C  | 3.94753500  | 0.36183100  | 5.82792600 |
| C | -3.02373500 | 5.67574600  | 1.27128700  | C  | 3.31563900  | 0.74333900  | 4.66277100 |
| C | -4.03670100 | 4.78567200  | 1.61923300  | C  | 2.99659100  | 2.10676400  | 4.40743700 |
| H | -4.49526900 | 2.77766700  | 2.22011300  | N  | 3.27496100  | 3.02648200  | 5.38791700 |
| H | -3.28177300 | 6.69603100  | 0.99805900  | H  | 4.17849700  | -0.68583500 | 6.00399400 |
| H | -5.07504200 | 5.10754600  | 1.62124800  | H  | 4.09754900  | 3.44127700  | 7.22261600 |
| C | -0.60486700 | 6.29107200  | 0.85543800  | H  | 4.77512300  | 1.08710400  | 7.71177800 |
| H | 0.36646600  | 5.82552300  | 1.05041700  | H  | 3.02198100  | 0.00683500  | 3.92521900 |
| C | -0.67120100 | 7.58870000  | 1.68166300  | Li | 1.01589400  | 4.04114800  | 3.42426400 |
| H | -0.58995300 | 7.38337600  | 2.75493900  | C  | -4.29668200 | 5.59560200  | 7.35644900 |
| H | 0.15156500  | 8.25868800  | 1.40650800  | C  | -3.56760500 | 5.52639500  | 6.17125900 |
| H | -1.60783000 | 8.13357700  | 1.51295600  | C  | -2.30056300 | 4.92443900  | 6.16055100 |
| C | -0.66986400 | 6.60660400  | -0.65270300 | C  | -1.76103100 | 4.39554100  | 7.34512900 |
| H | 0.13407900  | 7.29591800  | -0.93878100 | C  | -2.48944100 | 4.47167100  | 8.52699700 |
| H | -0.56689800 | 5.69819200  | -1.25595700 | C  | -3.75600200 | 5.06912600  | 8.53222900 |
| H | -1.62464100 | 7.07655700  | -0.91908700 | H  | -5.27973900 | 6.05749700  | 7.36685200 |
| C | -2.07978600 | 1.57706200  | 2.31880200  | H  | -3.97560400 | 5.92820700  | 5.24655300 |
| H | -1.00192800 | 1.42174500  | 2.22608300  | H  | -0.77351000 | 3.94541400  | 7.31474200 |
| C | -2.45163000 | 1.27095100  | 3.78309200  | H  | -2.07576100 | 4.06985400  | 9.44762200 |
| H | -3.52308600 | 1.41858200  | 3.96641200  | H  | -4.32178300 | 5.12550400  | 9.45850200 |
| H | -2.21404900 | 0.22820900  | 4.02739800  | C  | -1.55062500 | 4.86307800  | 4.89750000 |
| H | -1.89705400 | 1.91375500  | 4.47336800  | H  | -2.01348900 | 5.37687600  | 4.03600800 |
| C | -2.77932500 | 0.58639100  | 1.36675300  | O  | -0.47729500 | 4.28674900  | 4.76485300 |
| H | -2.52023100 | 0.78222200  | 0.32056100  | C  | 4.11010200  | 6.53476900  | 5.13373200 |
| H | -2.48632900 | -0.44386800 | 1.60287900  | C  | 5.60663400  | 6.85594700  | 5.09214500 |
| H | -3.87095500 | 0.64657200  | 1.45308200  | H  | 5.81769000  | 7.69004000  | 4.41197200 |
| N | 0.01271700  | 3.55842800  | 1.70988000  | H  | 5.94547400  | 7.14359600  | 6.09333100 |
| C | 0.61348800  | 2.86755000  | 0.76782100  | H  | 6.19332600  | 5.98972700  | 4.77690800 |
| C | -0.05012600 | 2.58368100  | -0.57406700 | C  | 3.34863900  | 7.71707700  | 5.76117600 |
| H | -0.41997100 | 1.55112300  | -0.60534800 | H  | 3.52720200  | 8.65803900  | 5.22775900 |
| H | -0.89384200 | 3.24895700  | -0.76765600 | H  | 2.27168900  | 7.52379300  | 5.77981400 |
|   |             |             |             | H  | 3.68672000  | 7.83884200  | 6.79537100 |
|   |             |             |             | C  | 3.49511900  | 6.08168500  | 3.75638000 |

|   |            |            |            |   |             |             |            |
|---|------------|------------|------------|---|-------------|-------------|------------|
| C | 4.47412300 | 5.24941000 | 2.91273800 | H | -8.18268900 | -5.95320900 | 2.01593100 |
| H | 4.92568700 | 4.44971600 | 3.50630200 | C | -6.16276200 | -1.73507900 | 2.32132900 |
| H | 3.93445400 | 4.79182900 | 2.07798400 | H | -5.26561900 | -1.34234800 | 2.81248400 |
| H | 5.27726700 | 5.87177700 | 2.50200700 | C | -7.38285400 | -1.09564300 | 3.01004000 |
| C | 2.92319100 | 7.21393400 | 2.90332100 | H | -7.43715300 | -1.38215200 | 4.06580800 |
| H | 2.51806000 | 6.80968600 | 1.96878700 | H | -7.32347700 | -0.00170900 | 2.95420600 |
| H | 2.11855400 | 7.74067700 | 3.42145400 | H | -8.32366800 | -1.39471800 | 2.53356400 |
| H | 3.70373700 | 7.93875000 | 2.64234200 | C | -6.09745000 | -1.31591700 | 0.83880100 |
| O | 3.91146400 | 5.38758300 | 5.96262300 | H | -6.08725200 | -0.22290400 | 0.74299200 |
| O | 2.40504100 | 5.23710100 | 4.19247600 | H | -5.19802300 | -1.70621600 | 0.35025300 |
| B | 2.76617100 | 4.65626100 | 5.48013700 | H | -6.96614600 | -1.69325400 | 0.28549500 |
| H | 1.81846900 | 4.55666800 | 6.23183900 | C | -3.80390400 | -6.10427300 | 3.66744700 |

**TS1**

|   |             |             |            |   |             |             |             |
|---|-------------|-------------|------------|---|-------------|-------------|-------------|
| C | -4.25863800 | 0.91724600  | 8.03804900 | H | -4.94257800 | -7.38912500 | 5.03064000  |
| C | -3.81276100 | 2.31324900  | 8.47434800 | H | -3.24220100 | -7.17745400 | 5.48105600  |
| H | -4.47452500 | 3.08253500  | 8.06007000 | H | -4.40387400 | -5.85380200 | 5.74914400  |
| H | -3.85552600 | 2.38478300  | 9.56599700 | C | -3.31912300 | -7.21871500 | 2.72044700  |
| H | -2.78810700 | 2.52721200  | 8.16193600 | H | -3.07765500 | -6.82784600 | 1.72500900  |
| C | -5.61674000 | 0.58325000  | 8.67060000 | H | -2.41900600 | -7.69736800 | 3.12522500  |
| H | -6.37468200 | 1.32879300  | 8.40669300 | H | -4.07628500 | -8.00153700 | 2.59286100  |
| H | -5.97950900 | -0.40238000 | 8.36855200 | N | -3.83800300 | -3.18404200 | 3.33438600  |
| H | -5.50622700 | 0.57948200  | 9.75960500 | C | -2.81861700 | -3.04493500 | 2.53345300  |
| C | -4.21443200 | 0.66613900  | 6.47854900 | C | -2.81583700 | -3.57776100 | 1.10784100  |
| C | -3.09796500 | 1.44652600  | 5.77082500 | H | -2.35176000 | -2.85289300 | 0.43049000  |
| H | -2.13938500 | 1.31977700  | 6.28330300 | H | -2.21761400 | -4.49635900 | 1.05280100  |
| H | -2.98972300 | 1.06523700  | 4.75084200 | H | -3.82085300 | -3.80850000 | 0.75192200  |
| H | -3.32508800 | 2.51672400  | 5.71820100 | C | -1.58715500 | -2.39140500 | 2.92088600  |
| C | -5.54180900 | 0.87193600  | 5.75556700 | H | -0.91919600 | -2.17756900 | 2.09145700  |
| H | -5.41975200 | 0.65686100  | 4.68916700 | C | -1.08326300 | -2.09046200 | 4.16948200  |
| H | -6.31939100 | 0.21282900  | 6.14677900 | C | 0.31004000  | -1.46305200 | 4.19508600  |
| H | -5.87902800 | 1.91048500  | 5.85280400 | H | 1.10904900  | -2.21298800 | 4.22848500  |
| O | -3.28102600 | -0.03412300 | 8.52883800 | H | 0.46752400  | -0.86982300 | 3.29013200  |
| O | -3.85207100 | -0.74324900 | 6.39815900 | H | 0.43641800  | -0.80644300 | 5.06112100  |
| B | -3.24142700 | -1.09298900 | 7.61270700 | N | -1.79002800 | -2.23631100 | 5.32569400  |
| H | -4.11633700 | -2.17334600 | 8.09869100 | C | -1.40445100 | -2.08046600 | 8.90171600  |
| C | -6.16322500 | -6.04130500 | 2.76382000 | C | -0.22939800 | -2.73575100 | 9.15265900  |
| C | -4.99952100 | -5.34089200 | 3.10144400 | C | 0.48219800  | -3.25491300 | 8.04878800  |
| C | -4.98729200 | -3.93382900 | 2.93752800 | C | -0.00386000 | -3.07660600 | 6.77886500  |
| C | -6.14041200 | -3.25344800 | 2.47793600 | C | -1.22749000 | -2.37519600 | 6.52645800  |
| C | -7.27386900 | -4.00331900 | 2.14258000 | N | -1.90405800 | -1.88823100 | 7.64360800  |
| C | -7.29220400 | -5.38801500 | 2.27874400 | H | 1.40206400  | -3.81274300 | 8.20350300  |
| H | -6.18516300 | -7.12109800 | 2.88793700 | H | -2.00910100 | -1.65623300 | 9.69403100  |
| H | -8.15853400 | -3.49289700 | 1.77023300 | H | 0.12011400  | -2.85717300 | 10.17093600 |

|            |             |             |             |   |             |             |            |
|------------|-------------|-------------|-------------|---|-------------|-------------|------------|
| H          | 0.50114100  | -3.51512400 | 5.92810300  | C | -7.62865600 | -3.81126900 | 3.20041500 |
| Li         | -3.82291100 | -2.54040900 | 5.25079800  | C | -7.72973200 | -5.18642400 | 3.39086100 |
| C          | -7.22548200 | -3.09812400 | 10.64257100 | H | -6.66192200 | -6.99724000 | 3.81122000 |
| C          | -6.01217600 | -3.19888600 | 9.96332300  | H | -8.52683800 | -3.23560700 | 2.99258500 |
| C          | -5.97839000 | -3.21286200 | 8.56357900  | H | -8.69753100 | -5.67835700 | 3.33679900 |
| C          | -7.17848500 | -3.13313200 | 7.85011800  | C | -6.32128200 | -1.64982500 | 3.02629600 |
| C          | -8.39497300 | -3.03391400 | 8.52802400  | H | -5.32442600 | -1.31387000 | 3.33205400 |
| C          | -8.42191100 | -3.01391200 | 9.92420600  | C | -7.34715800 | -0.86360700 | 3.86253700 |
| H          | -7.24121200 | -3.09057400 | 11.72974200 | H | -7.24145300 | -1.07986400 | 4.93179800 |
| H          | -5.07994100 | -3.26891800 | 10.52227000 | H | -7.20721600 | 0.21418100  | 3.71799800 |
| H          | -7.13408300 | -3.17174000 | 6.76607300  | H | -8.37877600 | -1.09859200 | 3.57587500 |
| H          | -9.32454100 | -2.97918100 | 7.96645800  | C | -6.47310800 | -1.31326700 | 1.52873100 |
| H          | -9.36961600 | -2.93972600 | 10.45164200 | H | -6.37687000 | -0.23330000 | 1.36196700 |
| C          | -4.66166700 | -3.33142600 | 7.81746200  | H | -5.71034700 | -1.81808800 | 0.92609400 |
| H          | -3.92937400 | -3.92892000 | 8.40637200  | H | -7.45504600 | -1.62593700 | 1.15267000 |
| O          | -4.68775700 | -3.52189100 | 6.53908000  | C | -4.09873200 | -6.18684100 | 4.03187200 |
|            |             |             |             | H | -3.20981600 | -5.55234200 | 3.97520900 |
|            |             |             |             | C | -4.16218000 | -6.74617600 | 5.46678200 |
| <b>IN3</b> |             |             |             | H | -5.02838000 | -7.40491400 | 5.60115200 |
| C          | -4.07445300 | 1.07886900  | 7.89530700  | H | -3.26019500 | -7.33035800 | 5.68913000 |
| C          | -3.72262500 | 2.29419800  | 8.75576500  | H | -4.24265900 | -5.94283300 | 6.20495600 |
| H          | -4.21778800 | 3.19913200  | 8.38412800  | C | -3.91785500 | -7.33084900 | 3.01476400 |
| H          | -4.05981700 | 2.12475100  | 9.78400700  | H | -3.86894100 | -6.95569200 | 1.98666200 |
| H          | -2.64465000 | 2.47203800  | 8.78068600  | H | -2.99198400 | -7.88173400 | 3.22058400 |
| C          | -5.57389800 | 0.76684600  | 8.03519600  | H | -4.74444600 | -8.04966200 | 3.06460900 |
| H          | -6.19925600 | 1.62056300  | 7.75098000  | N | -3.97480300 | -3.25151100 | 3.65051400 |
| H          | -5.85694900 | -0.09512200 | 7.42480000  | C | -3.07260900 | -3.27597600 | 2.69938000 |
| H          | -5.78532800 | 0.52192700  | 9.08117500  | C | -3.34169000 | -3.91610900 | 1.34446100 |
| C          | -3.60430000 | 1.17252300  | 6.39113100  | H | -2.93569300 | -3.28953200 | 0.54344400 |
| C          | -2.27430900 | 1.92744300  | 6.22646900  | H | -2.83752200 | -4.88810200 | 1.27723700 |
| H          | -1.51859800 | 1.55892300  | 6.92642800  | H | -4.40665400 | -4.07503900 | 1.16688500 |
| H          | -1.90255300 | 1.76722600  | 5.20922000  | C | -1.75781100 | -2.70624100 | 2.82765000 |
| H          | -2.39451800 | 3.00520400  | 6.38280200  | H | -1.20558900 | -2.66160400 | 1.89384000 |
| C          | -4.64158900 | 1.74886500  | 5.42747200  | C | -1.05274500 | -2.27256900 | 3.94268600 |
| H          | -4.23610900 | 1.75713900  | 4.40970700  | C | 0.35396000  | -1.74907000 | 3.65740700 |
| H          | -5.55794800 | 1.15477800  | 5.42187400  | H | 1.10894000  | -2.54428400 | 3.68168000 |
| H          | -4.89618100 | 2.78102200  | 5.69618800  | H | 0.38642500  | -1.30896200 | 2.65715400 |
| O          | -3.33153900 | -0.05310300 | 8.38506800  | H | 0.65457800  | -0.98370400 | 4.37826200 |
| O          | -3.37443600 | -0.20964700 | 6.05609800  | N | -1.58744700 | -2.22774900 | 5.18673300 |
| B          | -3.07964700 | -0.92892100 | 7.27916500  | C | -0.85213100 | -1.21141100 | 8.54223800 |
| H          | -3.98165200 | -2.39278900 | 9.24326800  | C | 0.42815800  | -1.66021600 | 8.78500600 |
| C          | -6.57986000 | -5.92505300 | 3.65167500  | C | 1.07366300  | -2.37325600 | 7.76176900 |
| C          | -5.31821500 | -5.32197000 | 3.71619100  | C | 0.43433500  | -2.57042700 | 6.55687000 |
| C          | -5.22541800 | -3.92189500 | 3.50915700  | C | -0.87360500 | -2.05643200 | 6.31837300 |
| C          | -6.39357700 | -3.15612900 | 3.26487800  |   |             |             |            |

|    |             |             |            |   |            |            |             |
|----|-------------|-------------|------------|---|------------|------------|-------------|
| N  | -1.49748000 | -1.40211300 | 7.36728900 | C | 5.48689000 | 2.49395100 | -2.98111700 |
| H  | 2.06838600  | -2.78279100 | 7.91886200 | C | 6.56192300 | 1.54178400 | -2.44013500 |
| H  | -1.42934200 | -0.66651200 | 9.27915500 | H | 6.56397500 | 1.52523100 | -1.34551800 |
| H  | 0.89738000  | -1.47756500 | 9.74479500 | H | 6.34878400 | 0.52822500 | -2.79386600 |
| H  | 0.90361400  | -3.15556500 | 5.77755000 | H | 7.56284000 | 1.82265600 | -2.78398000 |
| Li | -3.57480300 | -2.19195600 | 5.27939600 | C | 5.50378100 | 2.49376600 | -4.50829800 |
| C  | -6.11159900 | -6.01684100 | 9.12494700 | H | 5.44960100 | 1.46390300 | -4.87600500 |
| C  | -5.03848000 | -5.12684600 | 9.11004700 | H | 4.65498200 | 3.04352300 | -4.92114200 |
| C  | -5.06370000 | -3.98606700 | 8.29587800 | H | 6.42922500 | 2.94056600 | -4.88917200 |
| C  | -6.18527200 | -3.75736200 | 7.49307500 | O | 4.70219900 | 3.72565800 | -1.12076600 |
| C  | -7.25583800 | -4.65464700 | 7.49605000 | O | 4.20278900 | 1.97315200 | -2.53561300 |
| C  | -7.22509100 | -5.78418800 | 8.31378400 | B | 3.87477800 | 2.65998900 | -1.38498700 |
| H  | -6.07420100 | -6.89719700 | 9.76173000 | H | 2.48808900 | 0.33369600 | -0.31224700 |
| H  | -4.16842700 | -5.32142700 | 9.73487800 |   |            |            |             |
| H  | -6.21203100 | -2.88001600 | 6.85565000 |   |            |            |             |
| H  | -8.10844500 | -4.47165500 | 6.84794500 |   |            |            |             |
| H  | -8.05807800 | -6.48238100 | 8.31565800 |   |            |            |             |
| C  | -3.89912100 | -3.01829200 | 8.34203400 |   |            |            |             |
| H  | -2.96004700 | -3.58768900 | 8.43035400 |   |            |            |             |
| O  | -3.86308500 | -2.17335600 | 7.20828200 |   |            |            |             |

## 5g

|   |             |             |             |
|---|-------------|-------------|-------------|
| C | -1.67924700 | 0.62739100  | -0.22839500 |
| C | -0.37473400 | 0.48975100  | -0.70002100 |
| C | 0.62072700  | 1.40085300  | -0.32381900 |
| C | 0.28771600  | 2.45622300  | 0.52920200  |
| C | -1.02045400 | 2.59730400  | 0.99835500  |
| C | -2.00700000 | 1.68489700  | 0.62407400  |
| H | -2.44129900 | -0.08636000 | -0.53092100 |
| H | -0.12789500 | -0.33248800 | -1.36952800 |
| H | 1.05630900  | 3.16562900  | 0.81580900  |
| H | -1.26713100 | 3.42478200  | 1.65889300  |
| H | -3.02434500 | 1.79666100  | 0.98988900  |
| C | 2.03476300  | 1.19482300  | -0.82460500 |
| H | 2.02962100  | 0.96376500  | -1.89642300 |
| O | 2.83778200  | 2.34451900  | -0.56857700 |
| C | 5.52095000  | 3.92241200  | -2.30494000 |
| C | 6.90312000  | 4.39849200  | -1.86302800 |
| H | 7.57455600  | 4.50355600  | -2.72299100 |
| H | 6.81583800  | 5.37713800  | -1.38028700 |
| H | 7.35684700  | 3.71022700  | -1.14638700 |
| C | 4.83262600  | 5.00566800  | -3.14647700 |
| H | 5.42356800  | 5.27392200  | -4.02869000 |
| H | 3.84129600  | 4.68138300  | -3.47918800 |
| H | 4.70469900  | 5.90171100  | -2.53156800 |
